# Supplementary material
Source: PubMed Central journal article supplement (PMC7424705)

## Supporting Information

### **New 8-O-4' neolignans and their antibacterial activity from the whole plants of *Clematis lasiandra***

**Nan Hao<sup>†,1</sup>, Lirong Han<sup>†,1</sup>, Yantao Li<sup>†</sup>, Jiao Li<sup>‡</sup>, Xiaolin Tian<sup>†</sup>, Dan Kong<sup>†</sup>,  
Xiangrong Tian<sup>†,\*</sup>**

<sup>†</sup>College of Plant Protection, Northwest A&F University, Yangling 712100, China

<sup>‡</sup>College of Chemistry, Nankai University, Tianjin 300071, China

<sup>1</sup> Both authors contributed equally.

\* Correspondence to Dr. Xiangrong Tian, College of Plant Protection, Northwest A&F University, Yangling, 712100, PR China; Tel./Fax.: +86-29-87082710. Email addresses: [tianxiangrong@163.com](mailto:tianxiangrong@163.com) (X. Tian)

**Figure S1** HRESIMS spectrum of compound **1**

**Figure S2**  $^1\text{H}$ -NMR (500 MHz,  $\text{CD}_3\text{OD}$ ) spectrum of compound **1**

**Figure S3**  $^{13}\text{C}$ -NMR (125 MHz,  $\text{CD}_3\text{OD}$ ) spectrum of compound **1**

**Figure S4** HSQC spectrum of compound **1**

**Figure S5**  $^1\text{H}$ - $^1\text{H}$  COSY spectrum of compound **1**

**Figure S6** HMBC spectrum of compound **1**

**Figure S7** HRESIMS spectrum of compound **1**

**Figure S8**  $^1\text{H}$ -NMR (500 MHz,  $\text{CD}_3\text{OD}$ ) spectrum of compound **2**

**Figure S9**  $^{13}\text{C}$ -NMR (125 MHz,  $\text{CD}_3\text{OD}$ ) spectrum of compound **2**

**Figure S10** HSQC spectrum of compound **2**

**Figure S11**  $^1\text{H}$ - $^1\text{H}$  COSY spectrum of compound **2**

**Figure S12** HMBC spectrum of compound **2**

**Figure S13** HRESIMS spectrum of compound **3**

**Figure S14**  $^1\text{H}$ -NMR (500 MHz,  $\text{CD}_3\text{OD}$ ) spectrum of compound **3**

**Figure S15**  $^{13}\text{C}$ -NMR (125 MHz,  $\text{CD}_3\text{OD}$ ) spectrum of compound **3**

**Figure S16** HSQC spectrum of compound **3**

**Figure S17**  $^1\text{H}$ - $^1\text{H}$  COSY spectrum of compound **3**

**Figure S18** HMBC spectrum of compound **3**

**Figure S19** HRESIMS spectrum of compound **4**

**Figure S20**  $^1\text{H}$ -NMR (500 MHz,  $\text{CD}_3\text{OD}$ ) spectrum of compound **4**

**Figure S21**  $^{13}\text{C}$ -NMR (125 MHz,  $\text{CD}_3\text{OD}$ ) spectrum of compound **4**

**Figure S22**  $^1\text{H}$ -NMR (500 MHz,  $\text{CD}_3\text{OD}$ ) spectrum of compound **5**

**Figure S23**  $^{13}\text{C}$ -NMR (125 MHz,  $\text{CD}_3\text{OD}$ ) spectrum of compound **5**

**Figure S24**  $^1\text{H}$ -NMR (500 MHz,  $\text{CD}_3\text{OD}$ ) spectrum of compound **6**

**Figure S25**  $^{13}\text{C}$ -NMR (125 MHz,  $\text{CD}_3\text{OD}$ ) spectrum of compound **6**

**Figure S26** The chemical shift differences of H-9a and H-9b for compounds **5** and **6** compared with **1** and **2** in  $\text{CD}_3\text{OD}$  (red for *erythro*, blue for *threo*).

**Figure S27** Comparison of  $J_{7,8}$  (Hz) values for compounds **1-6** in  $\text{CDCl}_3$ .

**Figure S28**  $^1\text{H}$ -NMR (500 MHz,  $\text{CDCl}_3$ ) spectrum of compound **1**

**Figure S29**  $^1\text{H}$ -NMR (500 MHz,  $\text{CDCl}_3$ ) spectrum of compound **2**

**Figure S30**  $^1\text{H-NMR}$  (500 MHz,  $\text{CDCl}_3$ ) spectrum of compound **3**

**Figure S31**  $^1\text{H-NMR}$  (500 MHz,  $\text{CDCl}_3$ ) spectrum of compound **4**

**Figure S32**  $^1\text{H-NMR}$  (500 MHz,  $\text{CDCl}_3$ ) spectrum of compound **5**

**Figure S33**  $^1\text{H-NMR}$  (500 MHz,  $\text{CDCl}_3$ ) spectrum of compound **6**

**Figure S34.** Experimental ECD spectra of compounds **1-6**

**Figure S35.** UV spectra of compounds **1-6**.

**Figure S1** HRESIMS spectrum of compound **1**

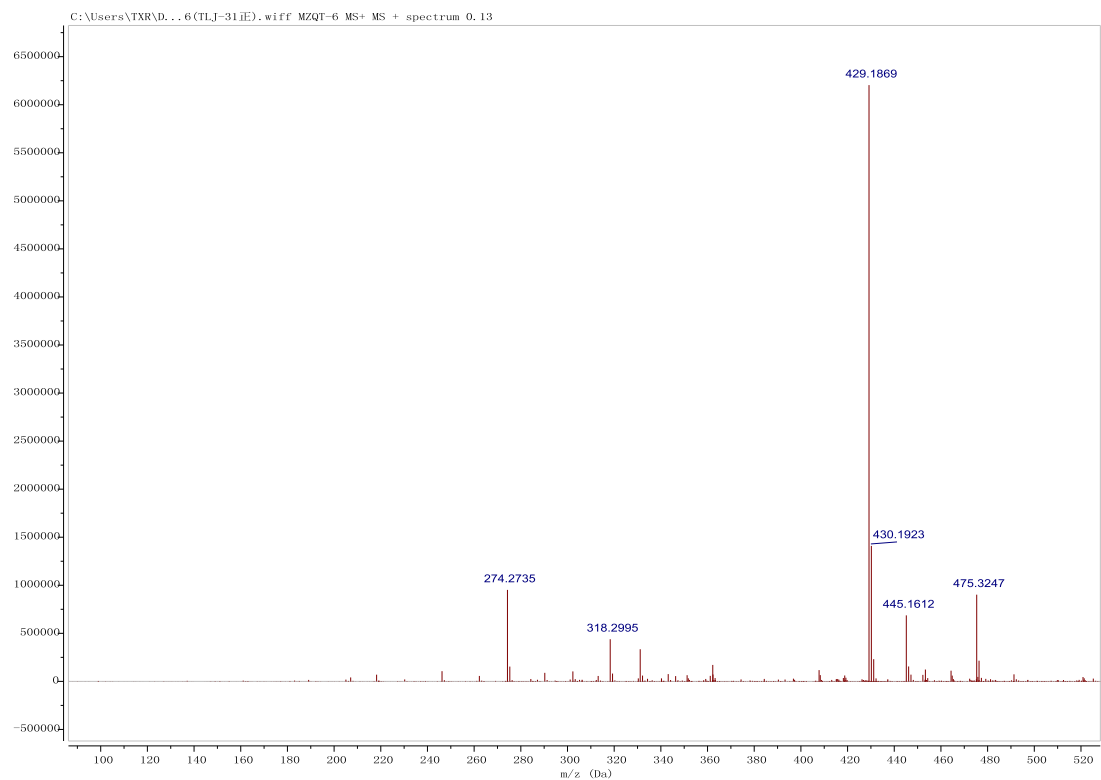

**Figure S2**  $^1\text{H-NMR}$  (500 MHz,  $\text{CD}_3\text{OD}$ ) spectrum of compound **1**

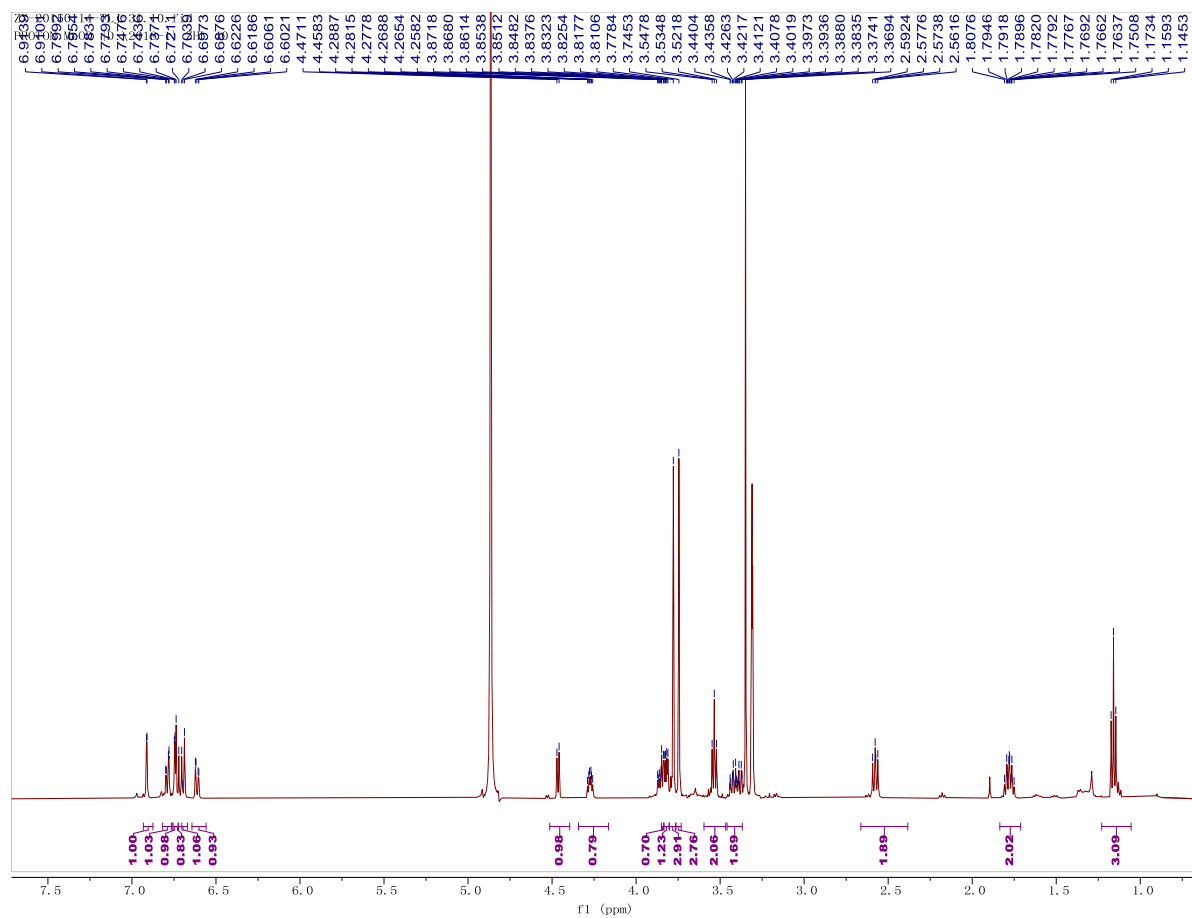

**Figure S3**  $^{13}\text{C}$ -NMR (125 MHz,  $\text{CD}_3\text{OD}$ ) spectrum of compound **1**

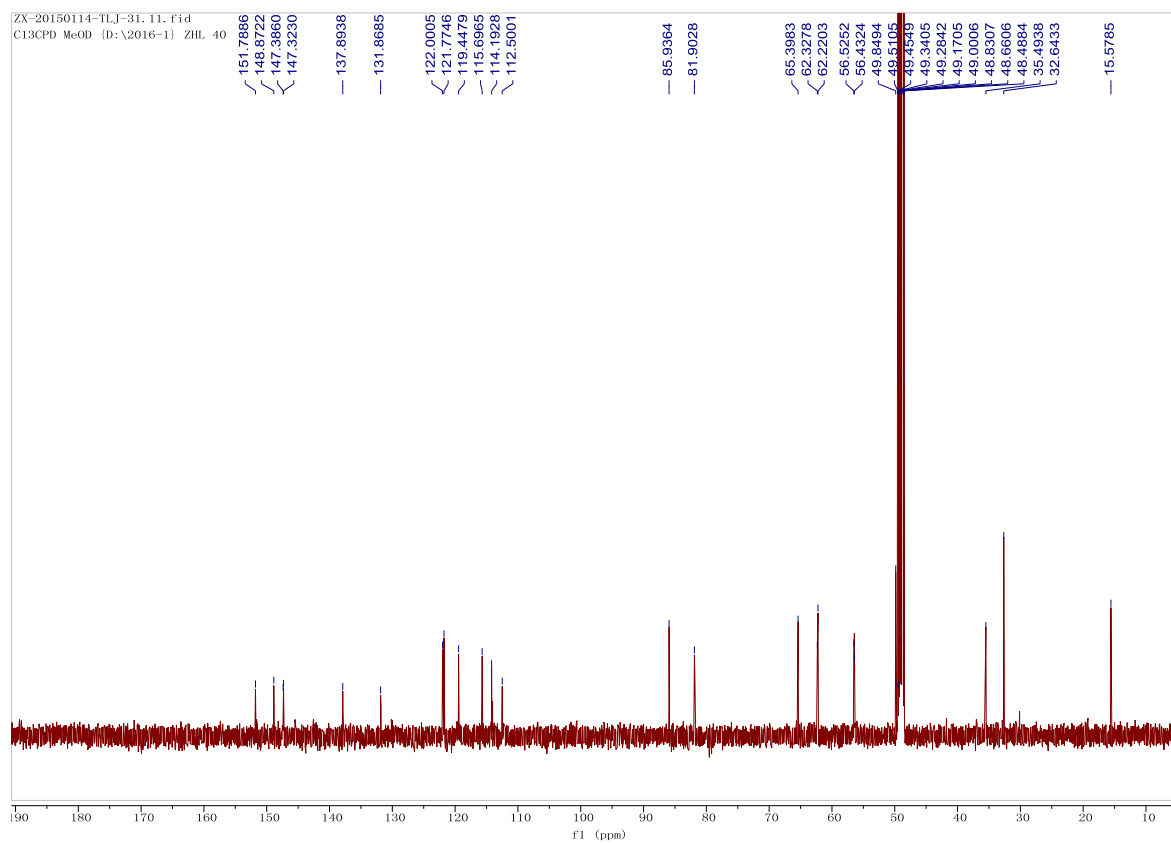

**Figure S4** HSQC spectrum of compound **1**

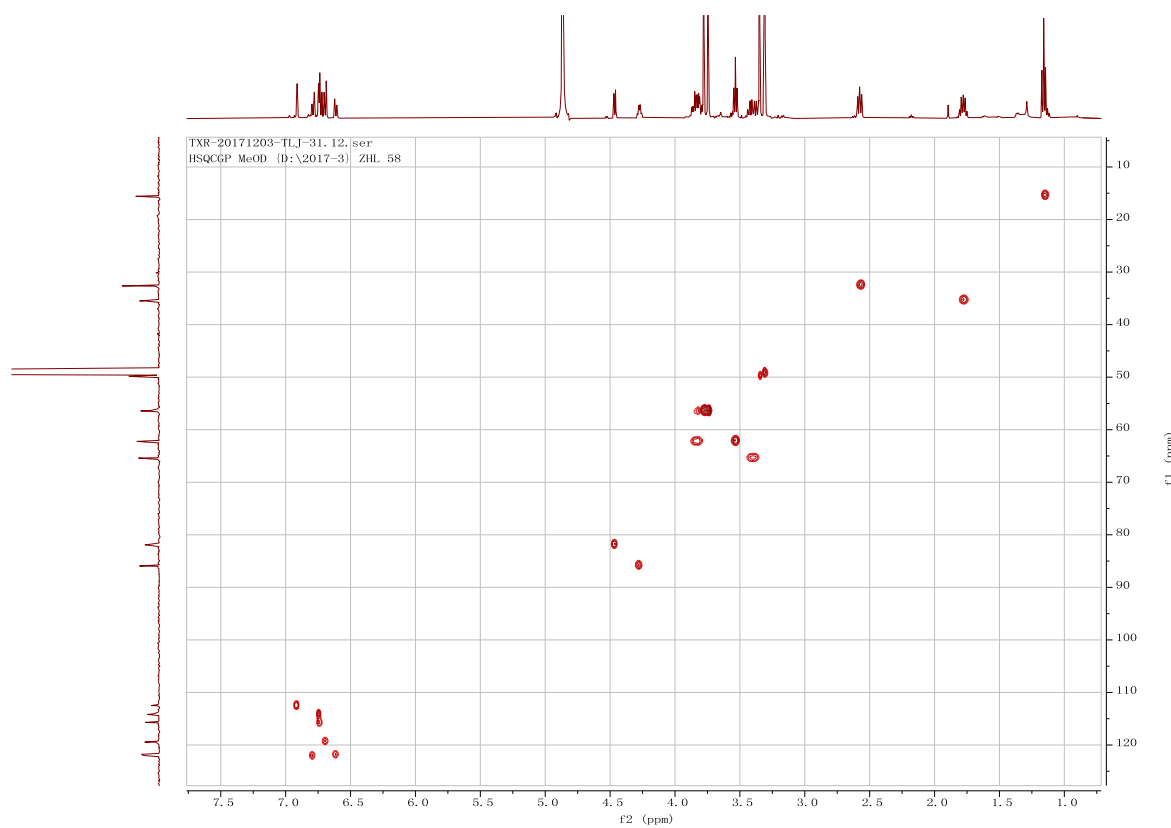

**Figure S5**  $^1\text{H}$ - $^1\text{H}$  COSY spectrum of compound **1**

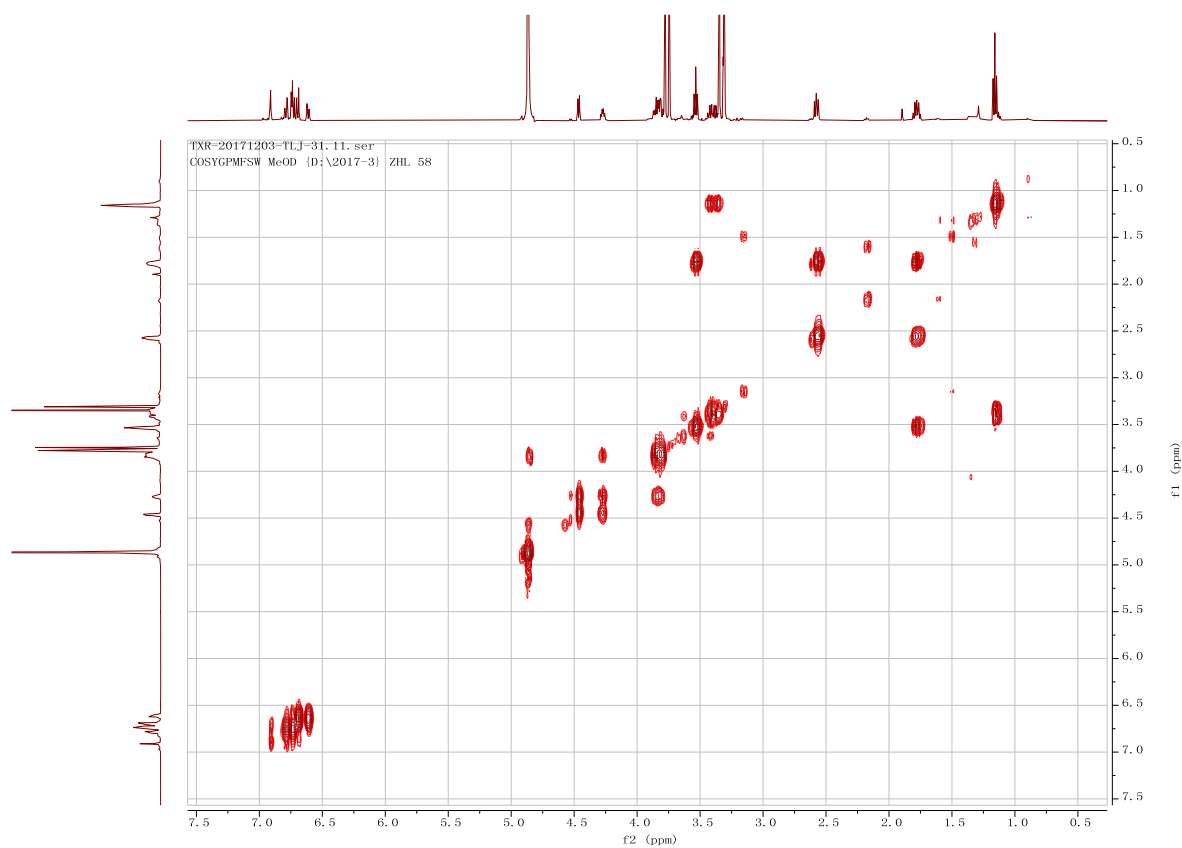

**Figure S6** HMBC spectrum of compound **1**

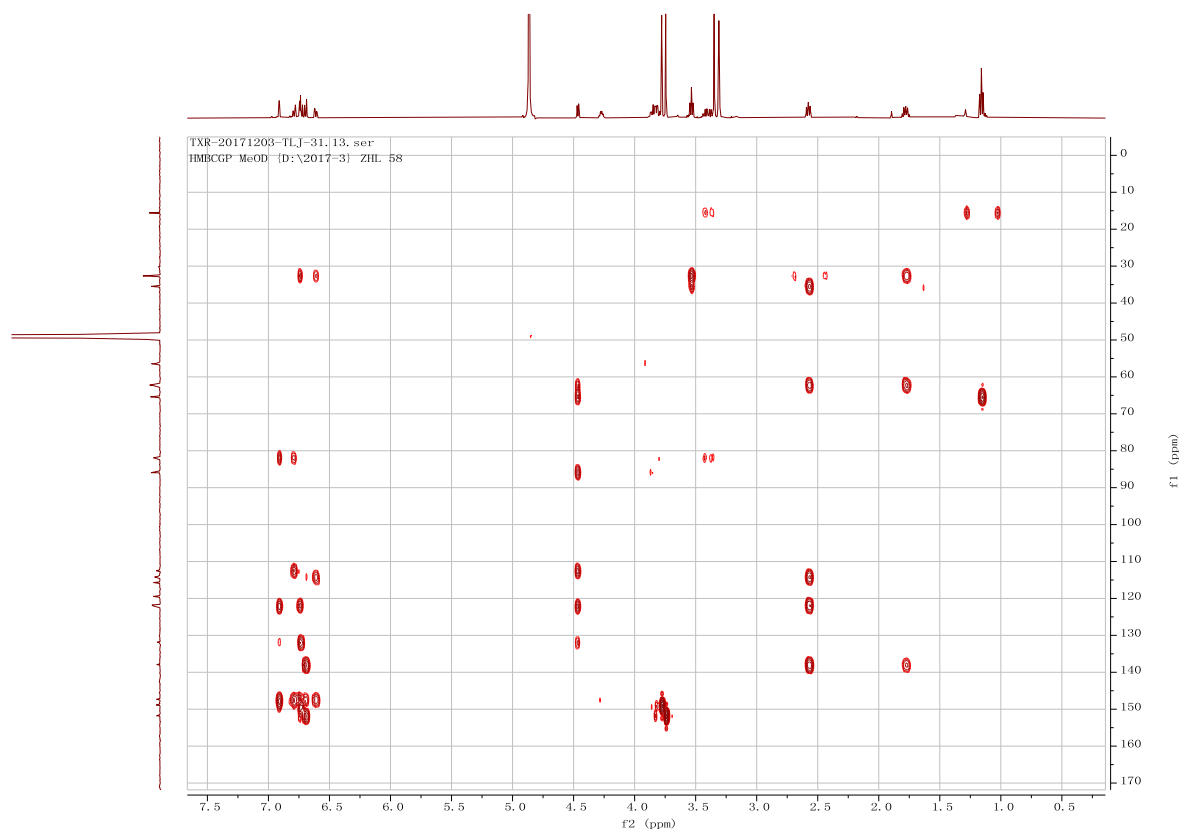

**Figure S7** HRESIMS spectrum of compound **2**

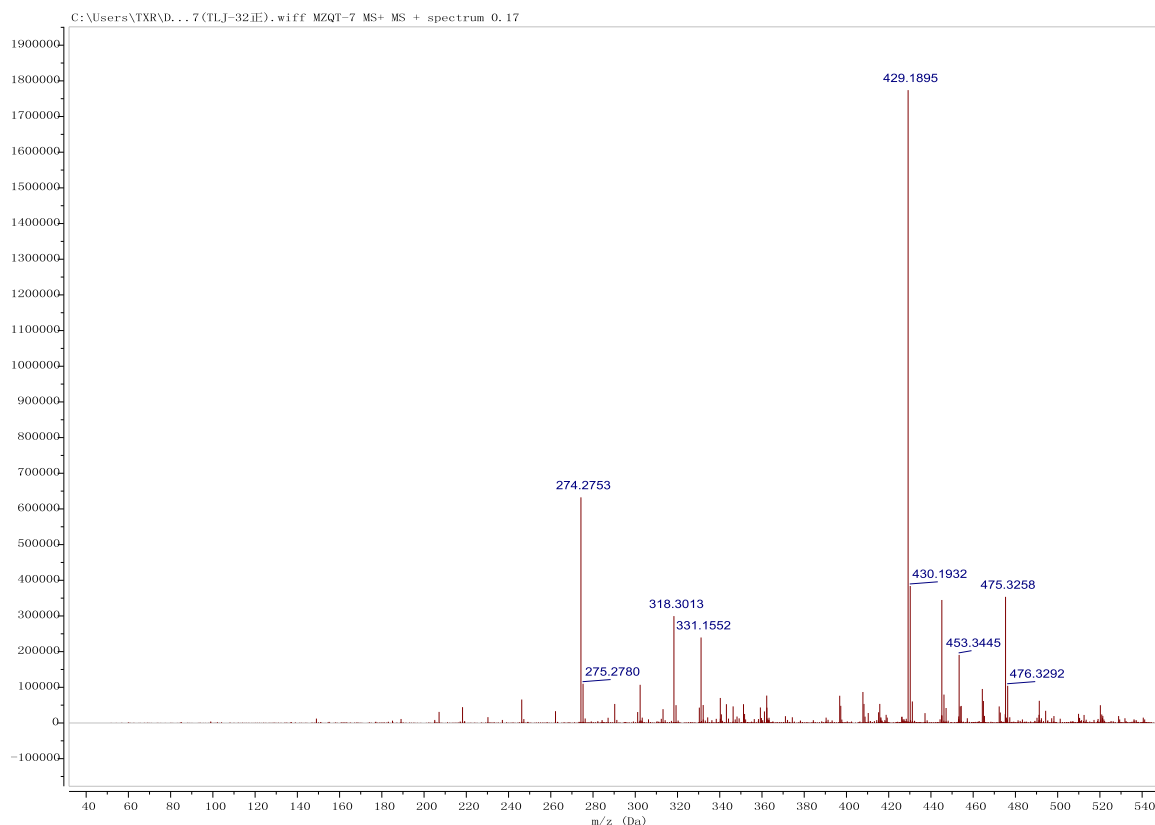

**Figure S8**  $^1\text{H-NMR}$  (500 MHz,  $\text{CD}_3\text{OD}$ ) spectrum of compound **2**

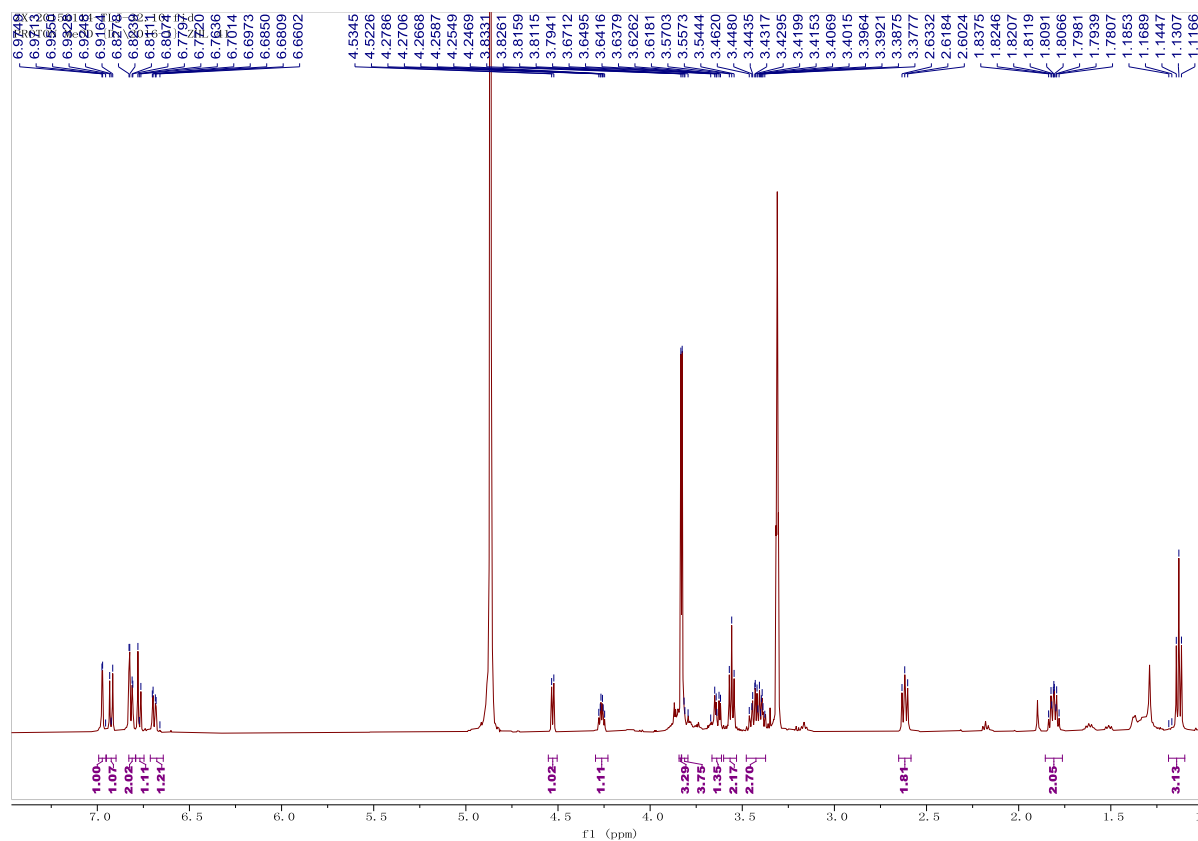

**Figure S9**  $^{13}\text{C}$ -NMR (125 MHz,  $\text{CD}_3\text{OD}$ ) spectrum of compound **2**

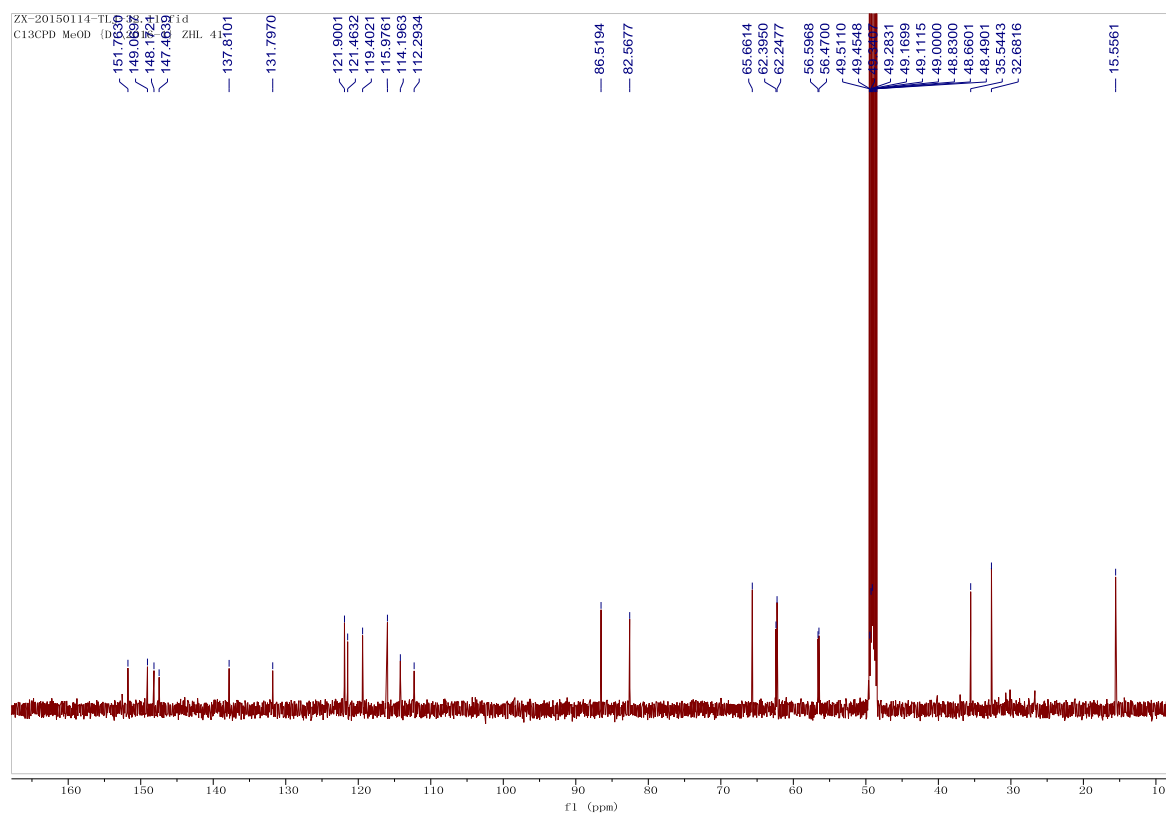

**Figure S10** HSQC spectrum of compound **2**

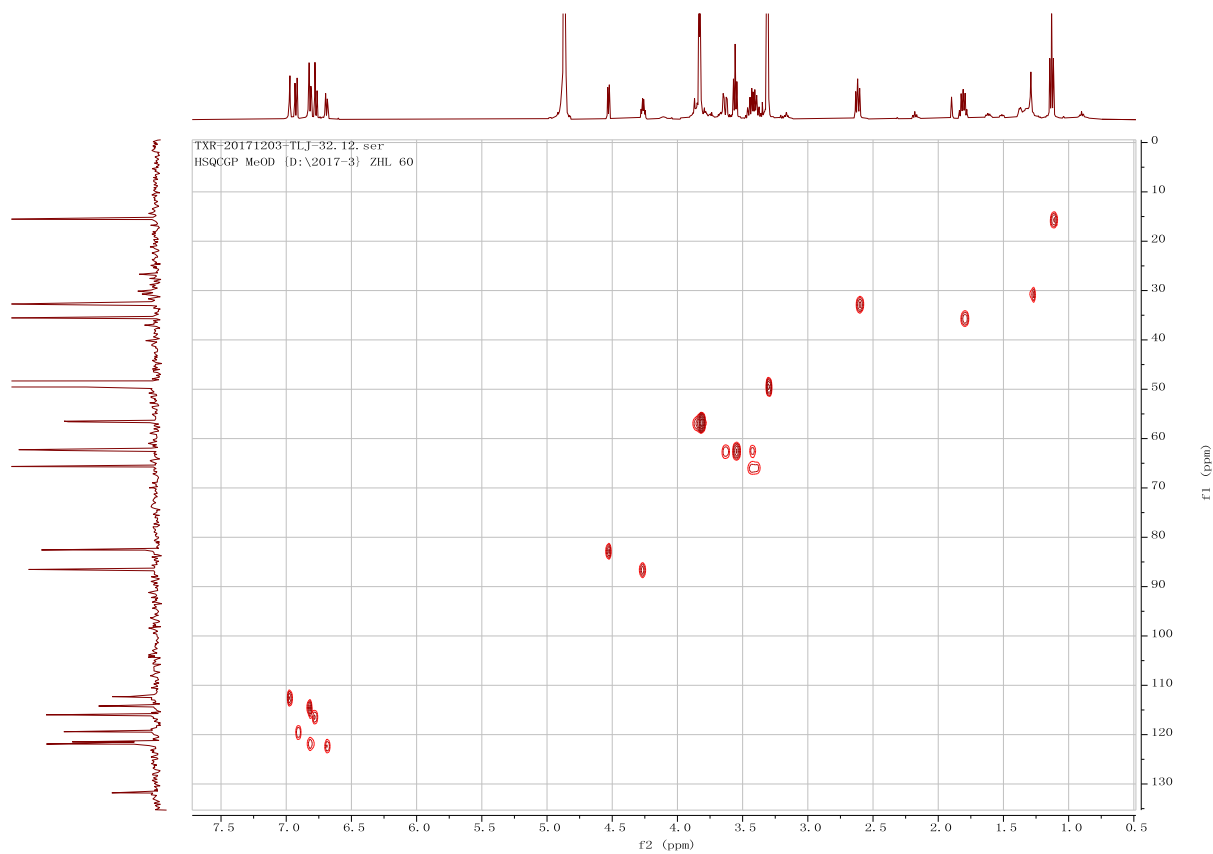



**Figure S11**  $^1\text{H}$ - $^1\text{H}$  COSY spectrum of compound **2**

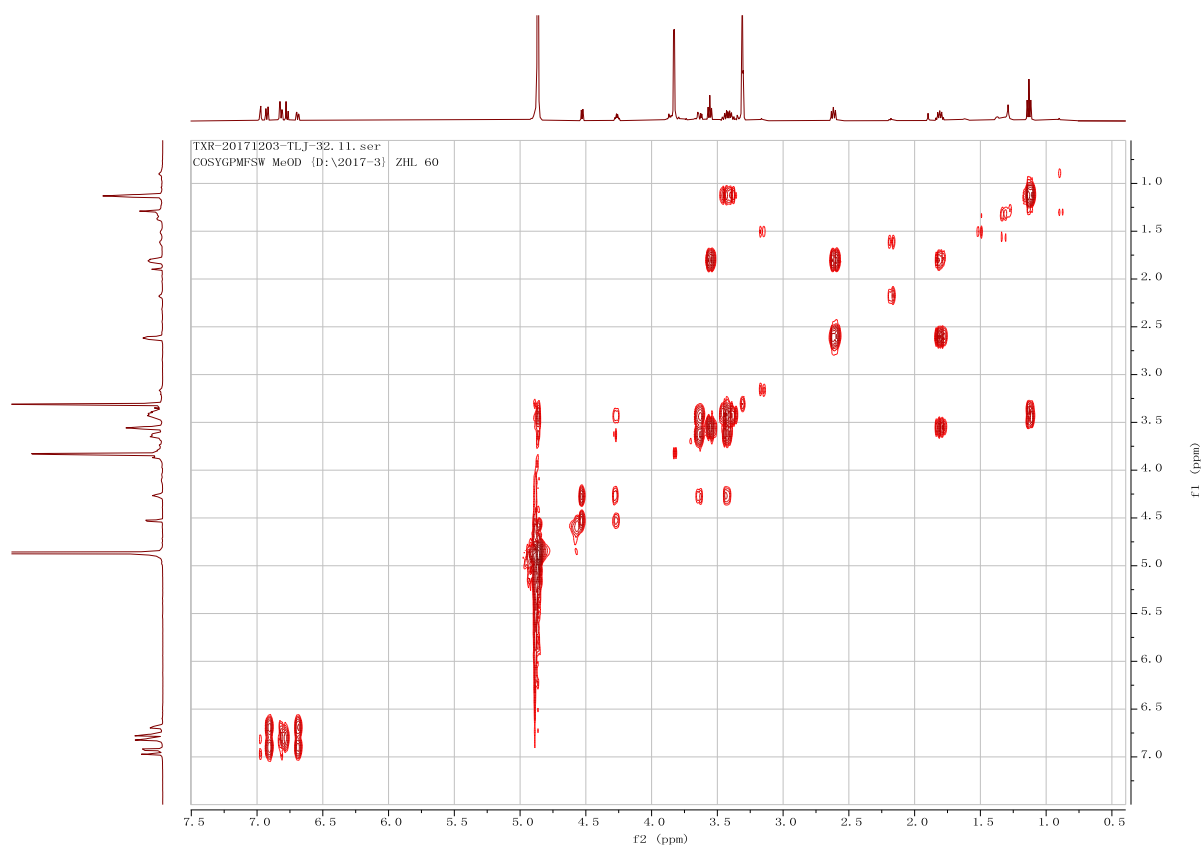

**Figure S12** HMBC spectrum of compound **2**

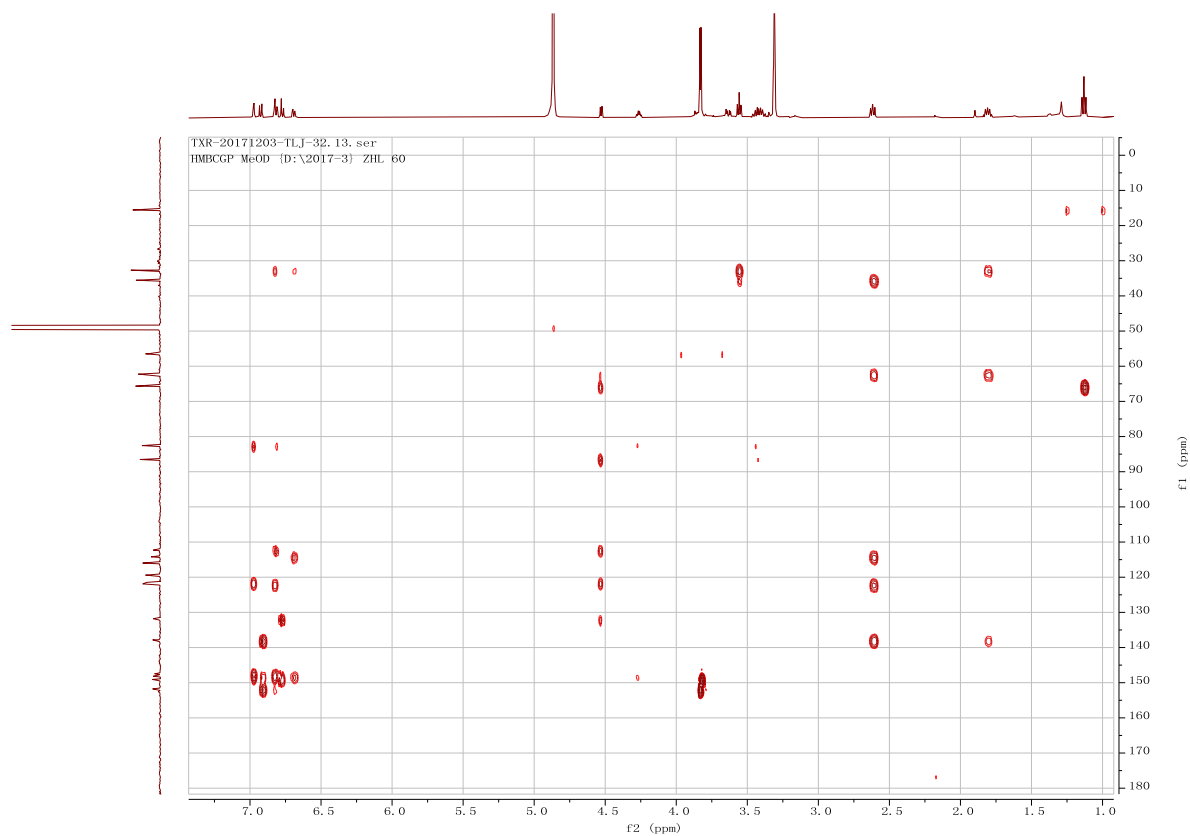

**Figure S13** HRESIMS spectrum of compound **3**

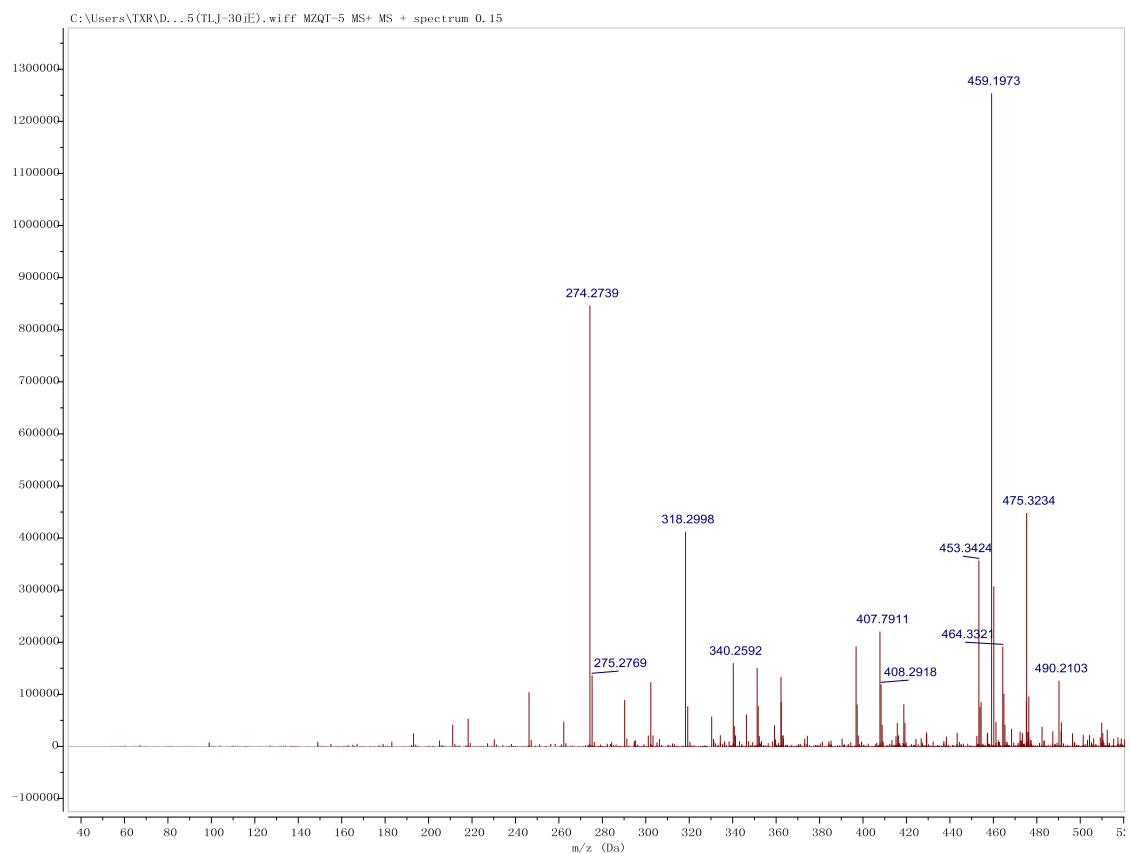

**Figure S14**  $^1\text{H-NMR}$  (500 MHz,  $\text{CD}_3\text{OD}$ ) spectrum of compound **3**

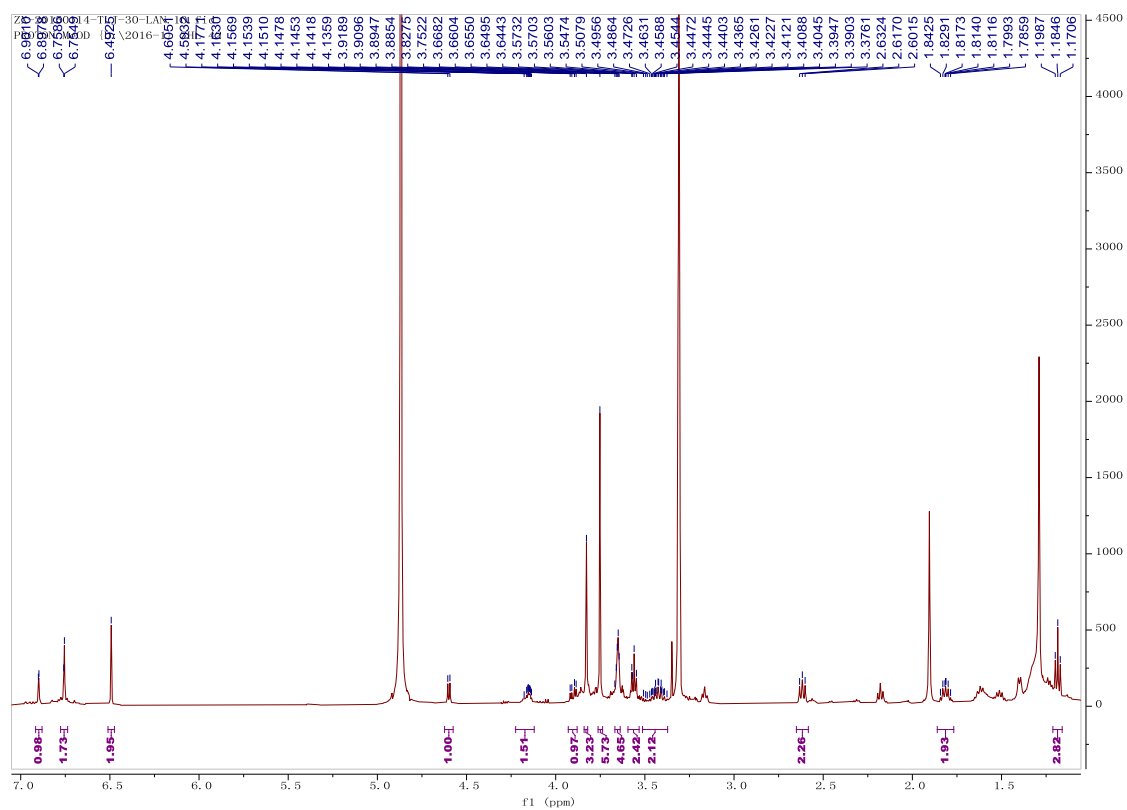

**Figure S15**  $^{13}\text{C}$ -NMR (125 MHz,  $\text{CD}_3\text{OD}$ ) spectrum of compound **3**

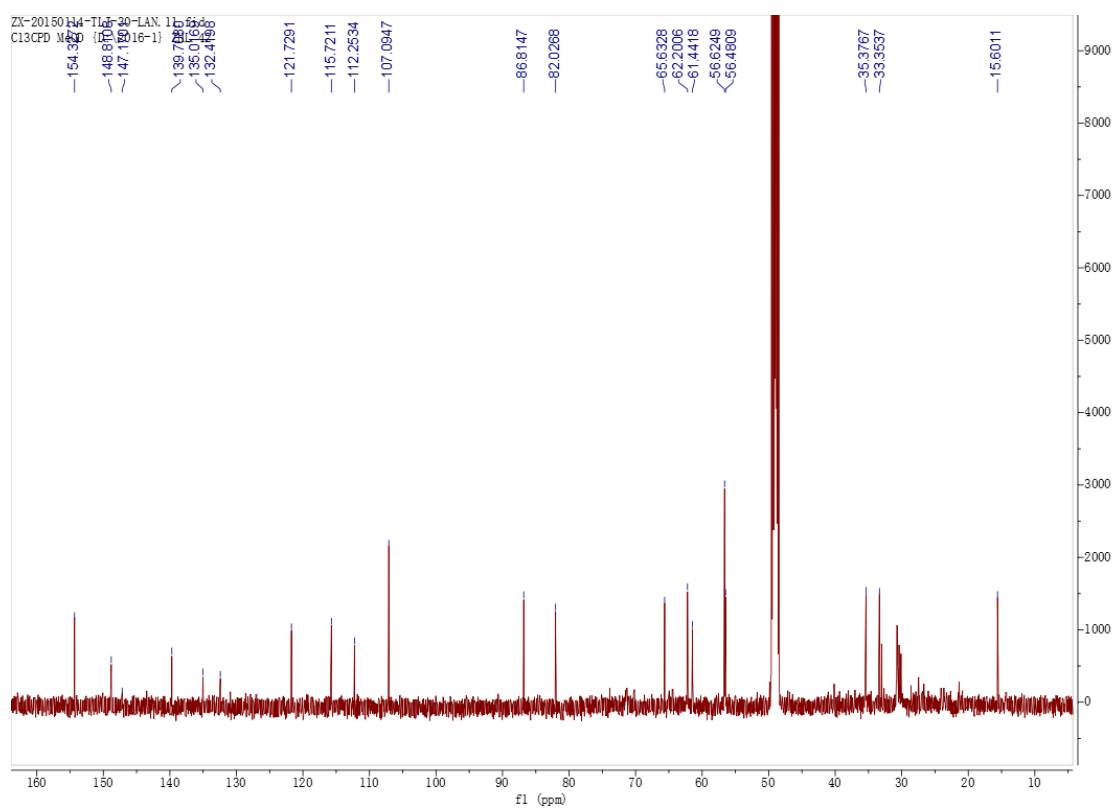

**Figure S16** HSQC spectrum of compound **3**

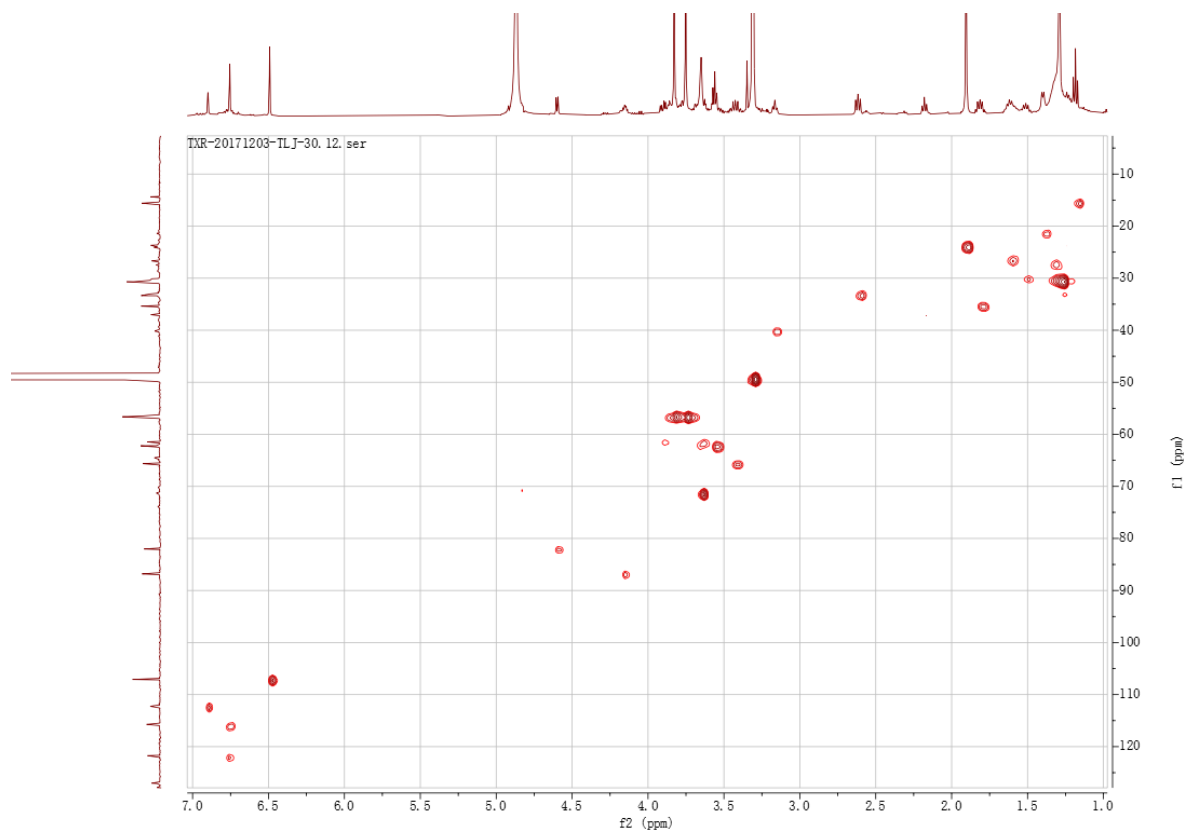

**Figure S17**  $^1\text{H}$ - $^1\text{H}$  COSY spectrum of compound **3**

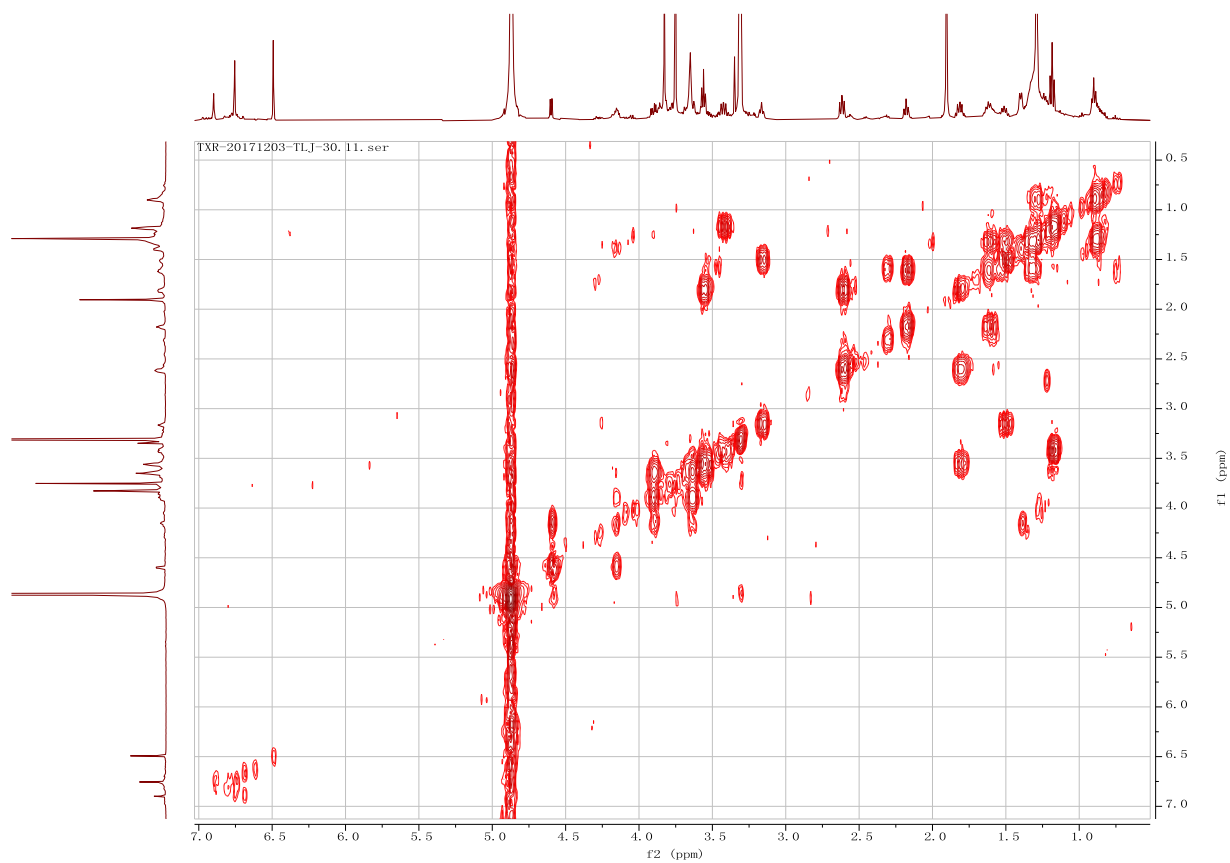

**Figure S18** HMBC spectrum of compound **3**

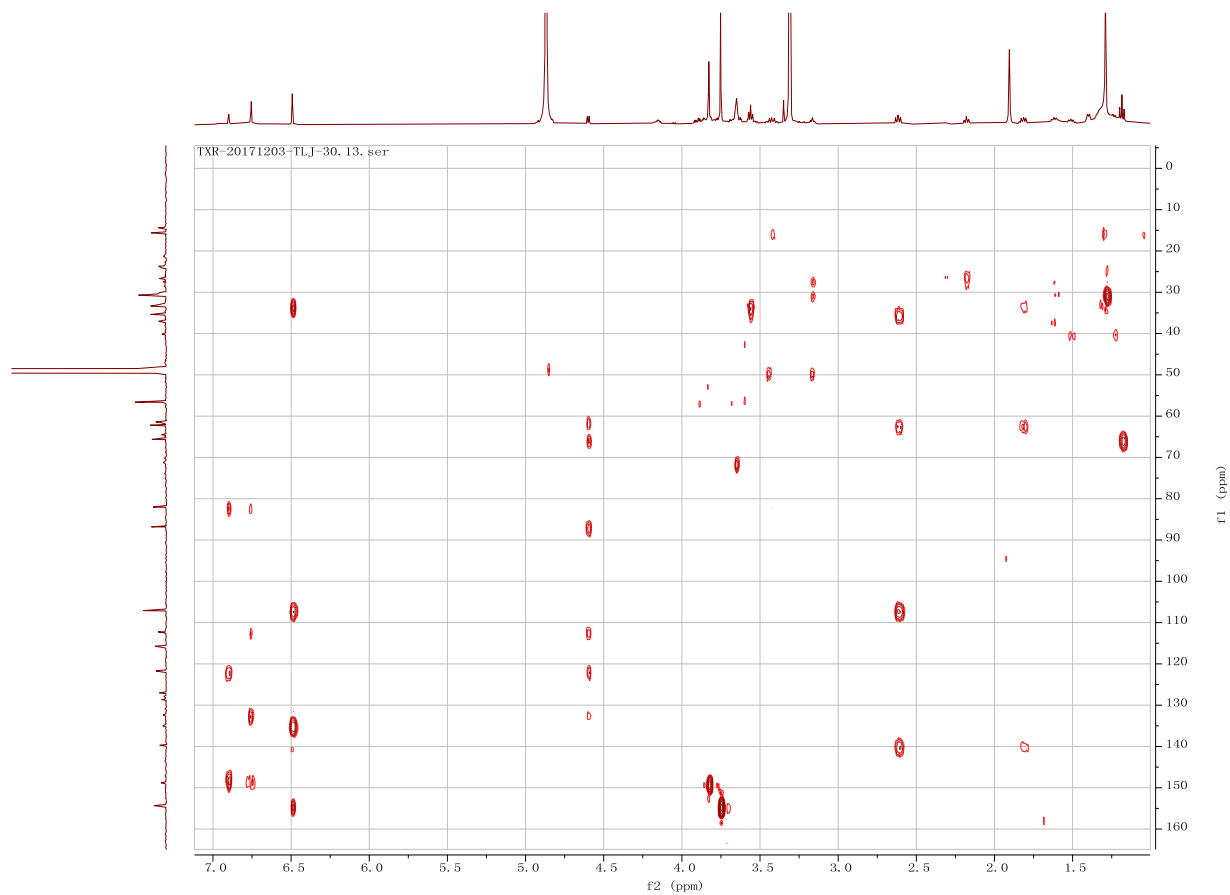

**Figure S19** HRESIMS spectrum of compound **4**

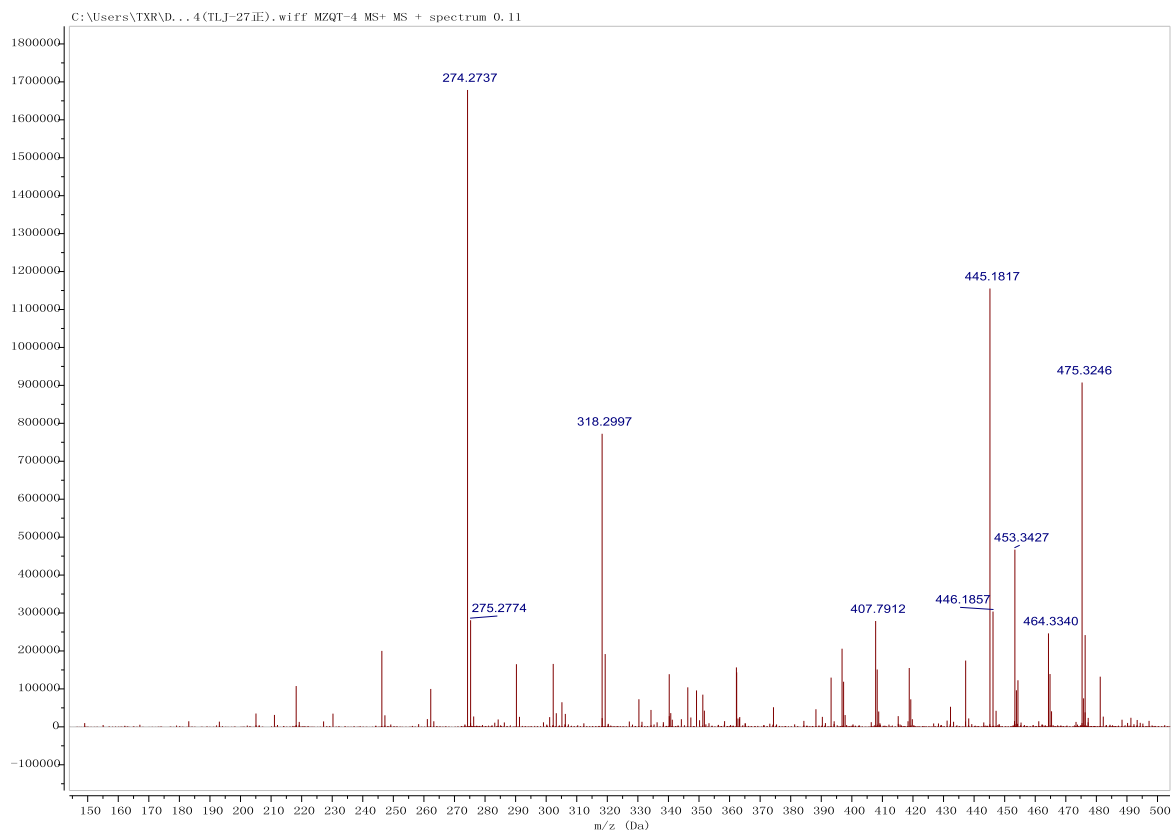

**Figure S20**  $^1\text{H-NMR}$  (500 MHz,  $\text{CD}_3\text{OD}$ ) spectrum of compound **4**

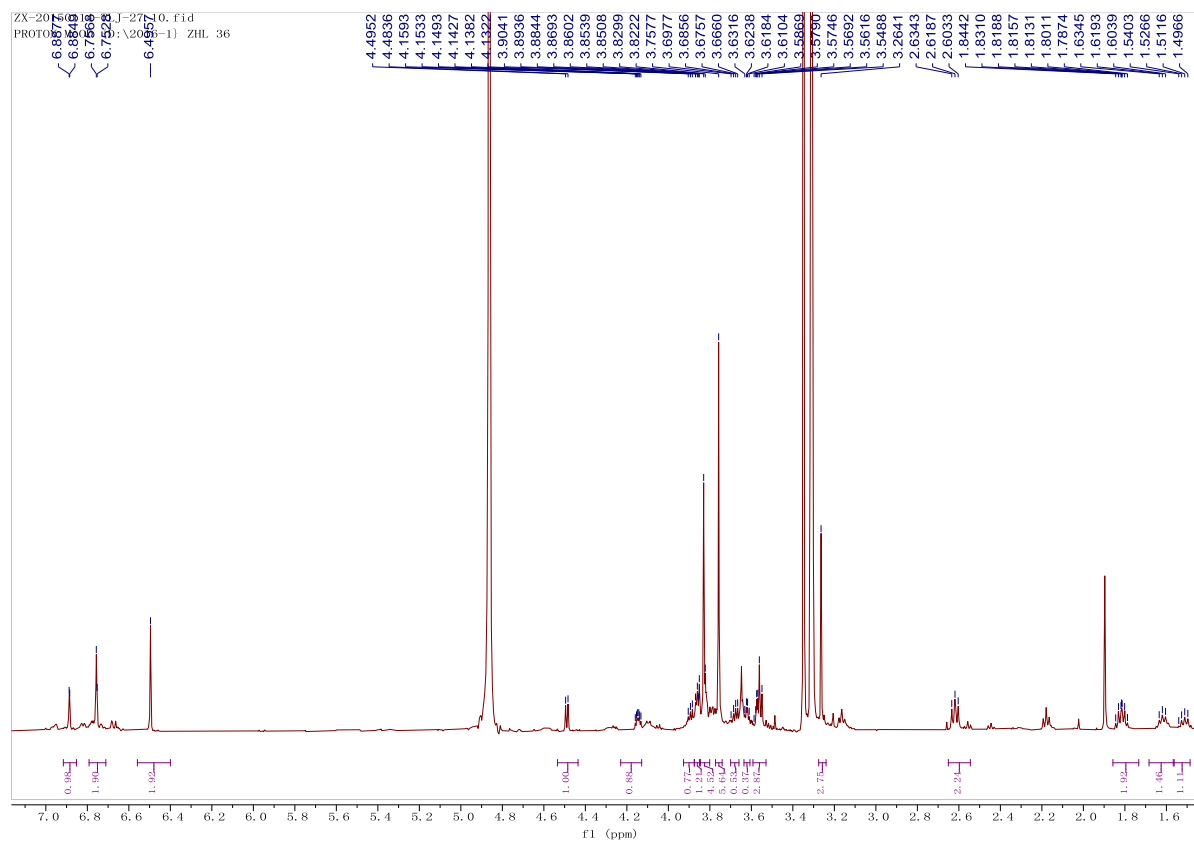

**Figure S21**  $^{13}\text{C}$ -NMR (125 MHz,  $\text{CD}_3\text{OD}$ ) spectrum of compound **4**

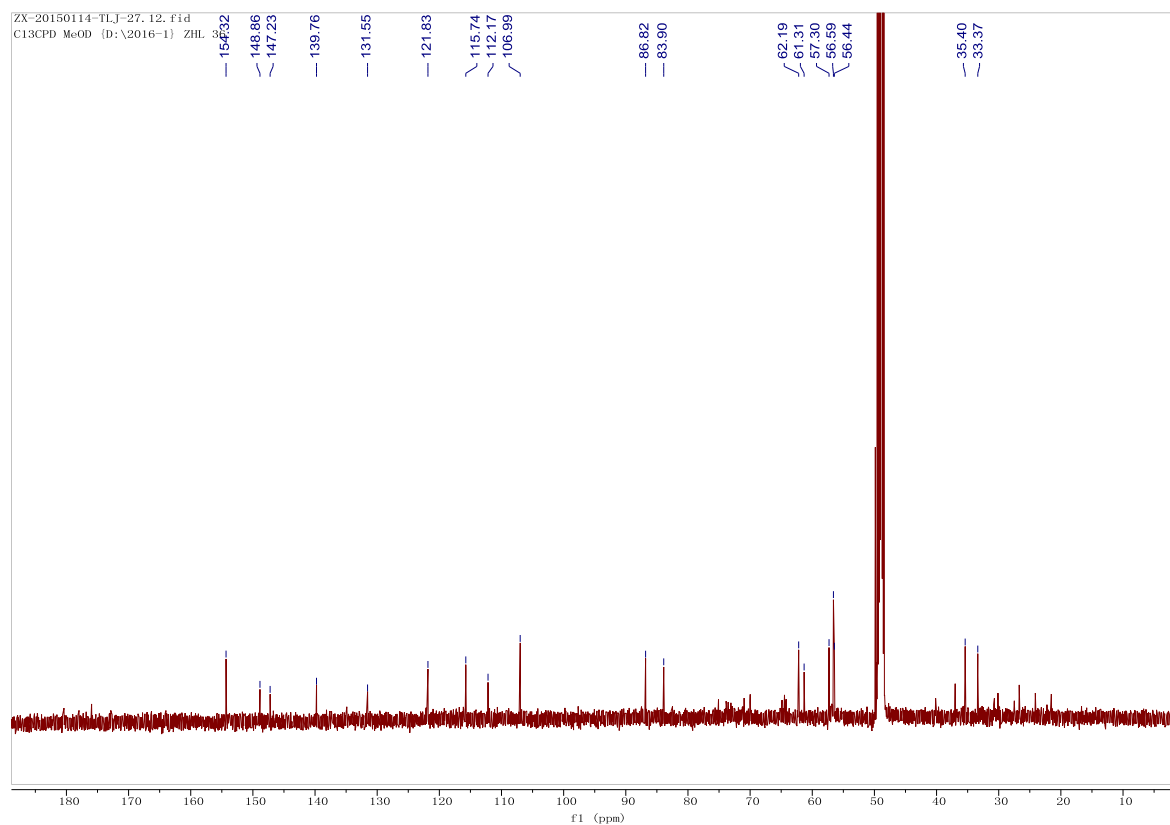

**Figure S22**  $^1\text{H}$ -NMR (500 MHz,  $\text{CD}_3\text{OD}$ ) spectrum of compound **5**

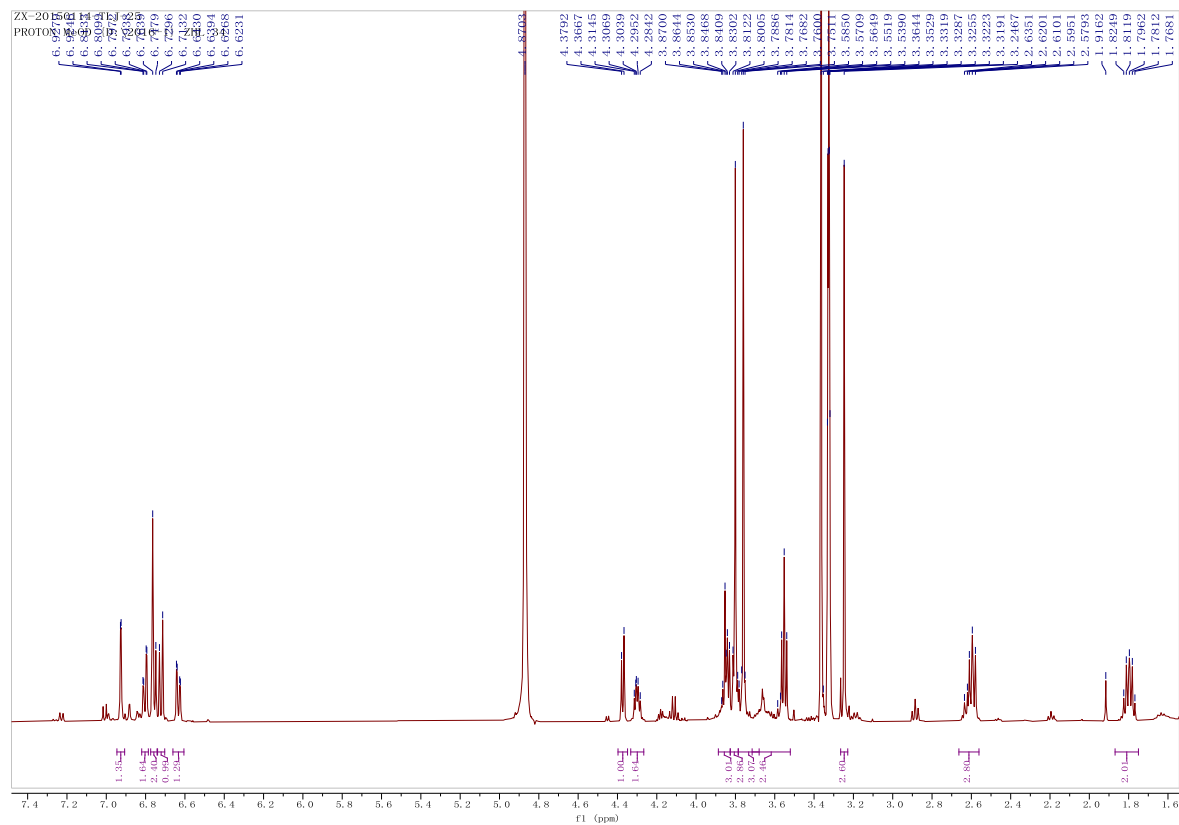

**Figure S23**  $^{13}\text{C}$ -NMR (125 MHz,  $\text{CD}_3\text{OD}$ ) spectrum of compound **5**

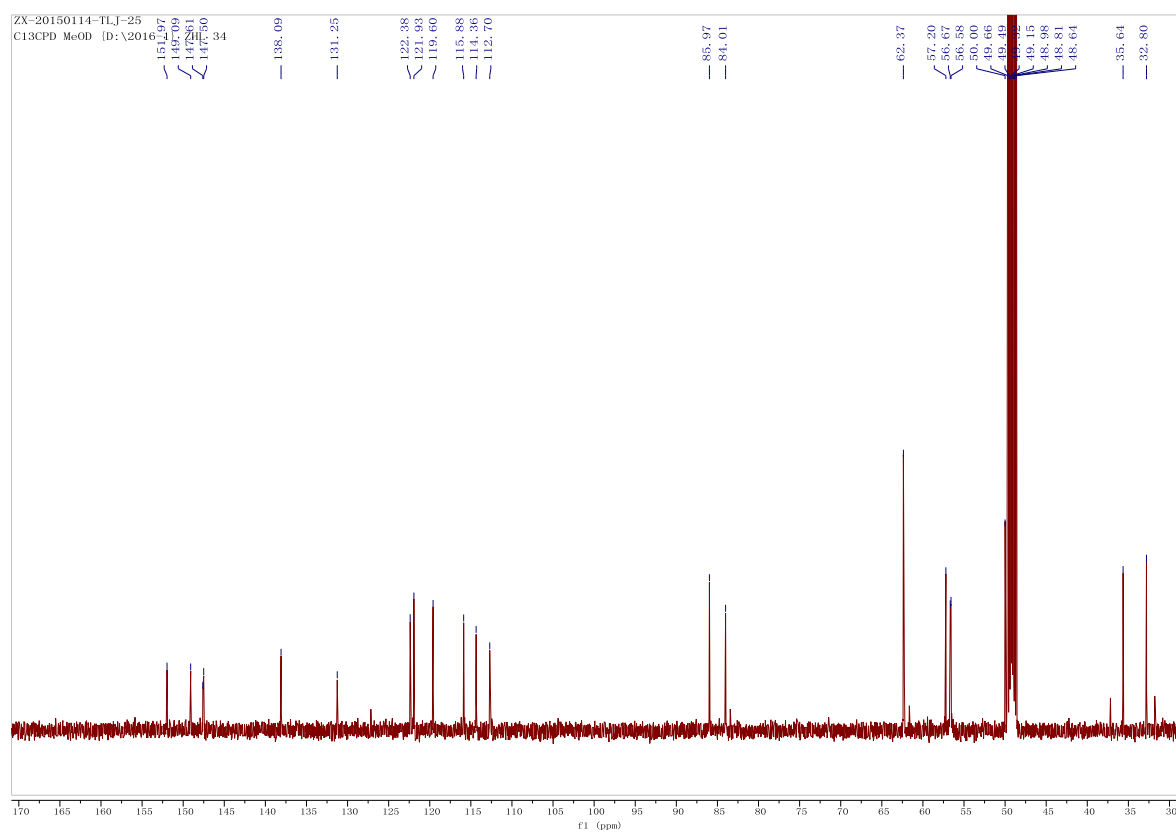

**Figure S24**  $^1\text{H}$ -NMR (500 MHz,  $\text{CD}_3\text{OD}$ ) spectrum of compound **6**

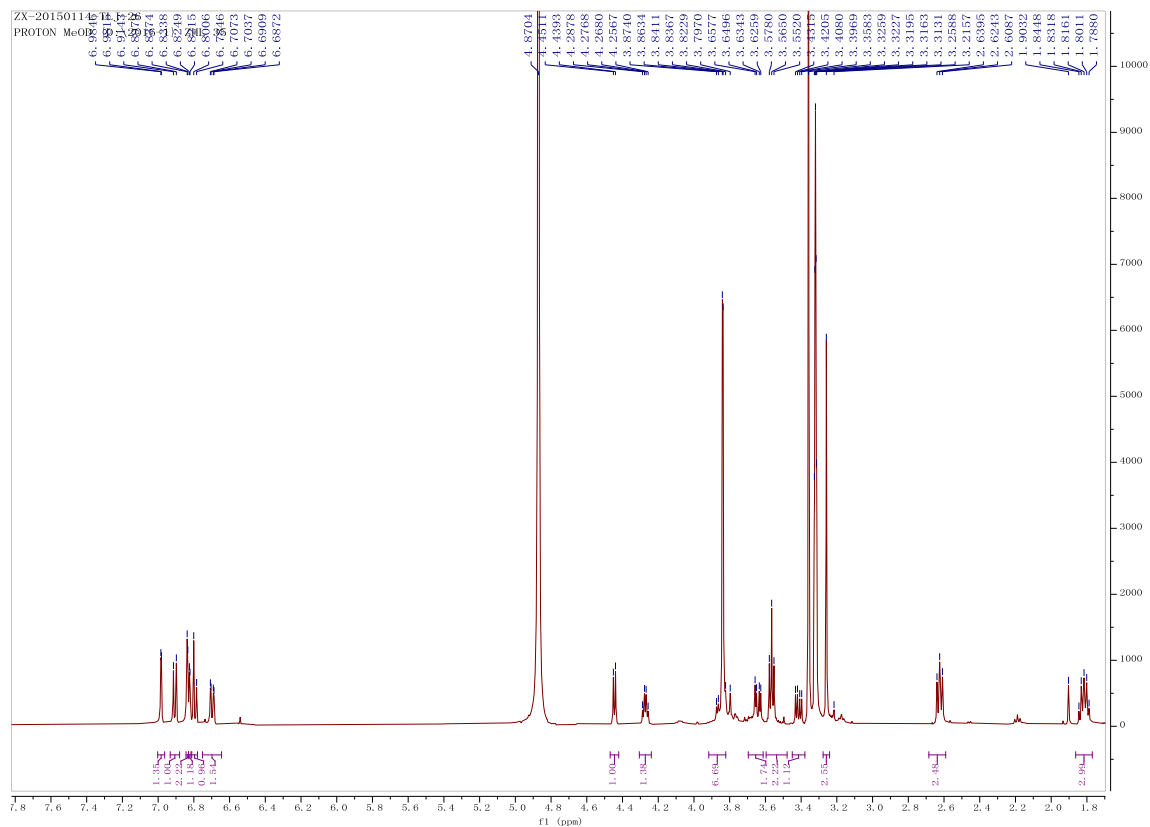

**Figure S25**  $^{13}\text{C}$ -NMR (125 MHz,  $\text{CD}_3\text{OD}$ ) spectrum of compound **6**

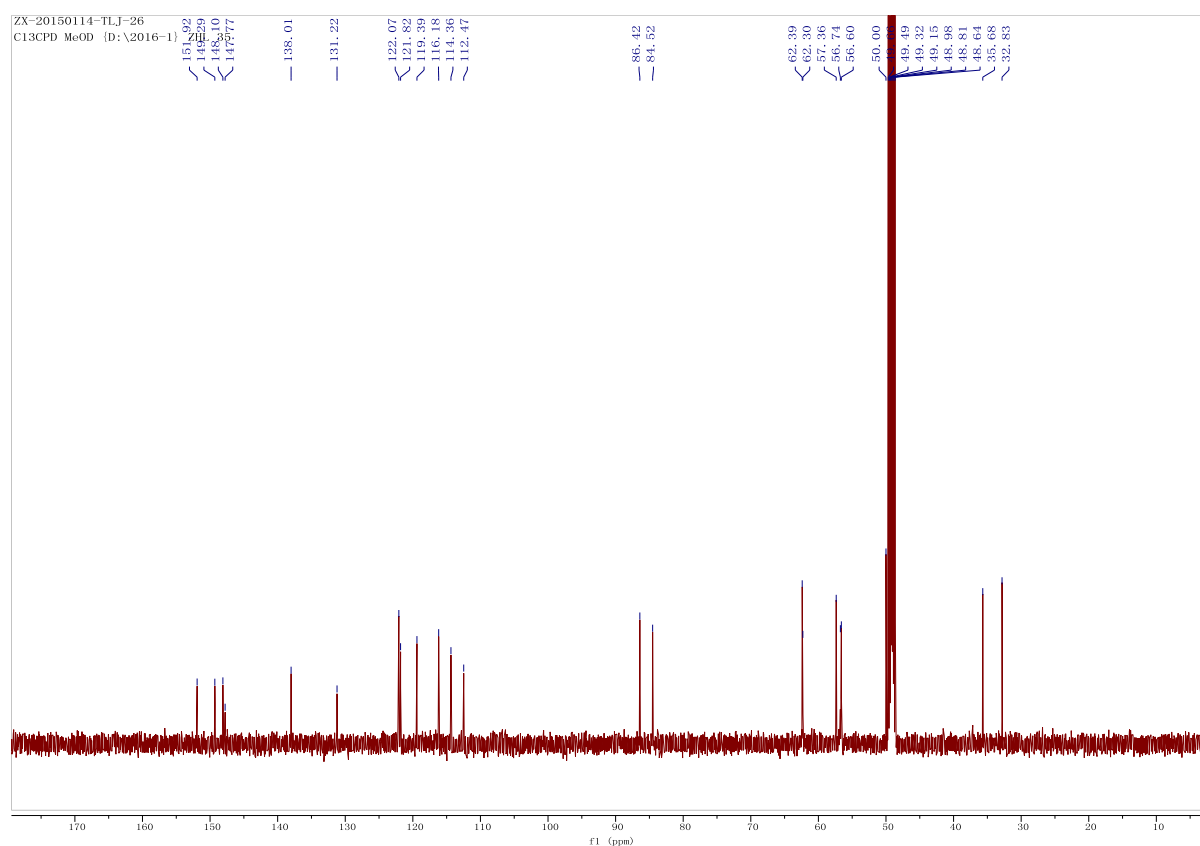

**Figure S26** The chemical shift differences of H-9a and H-9b for compounds **5** and **6** compared with **1** and **2** in  $\text{CD}_3\text{OD}$  (red for *erythro*, blue for *threo*).

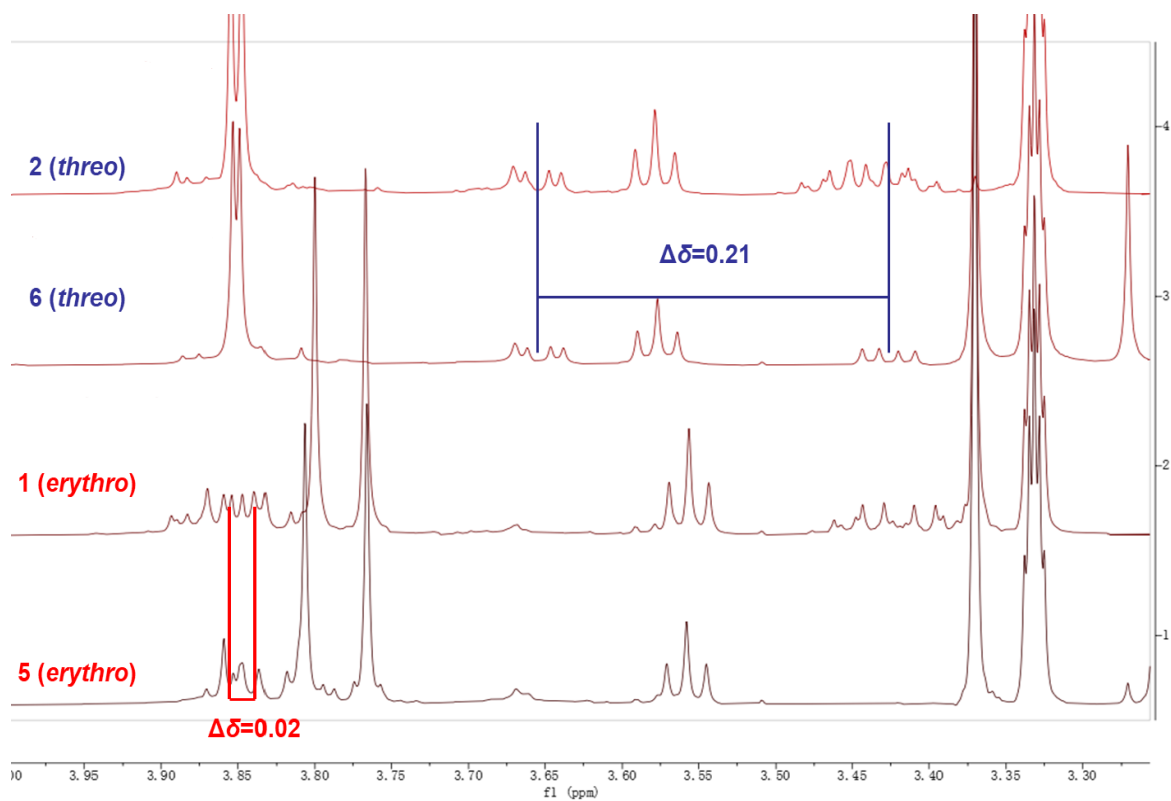



**Figure S27.** Comparison of  $J_{7,8}$  (Hz) values for compounds **1-6** in  $\text{CDCl}_3$ .

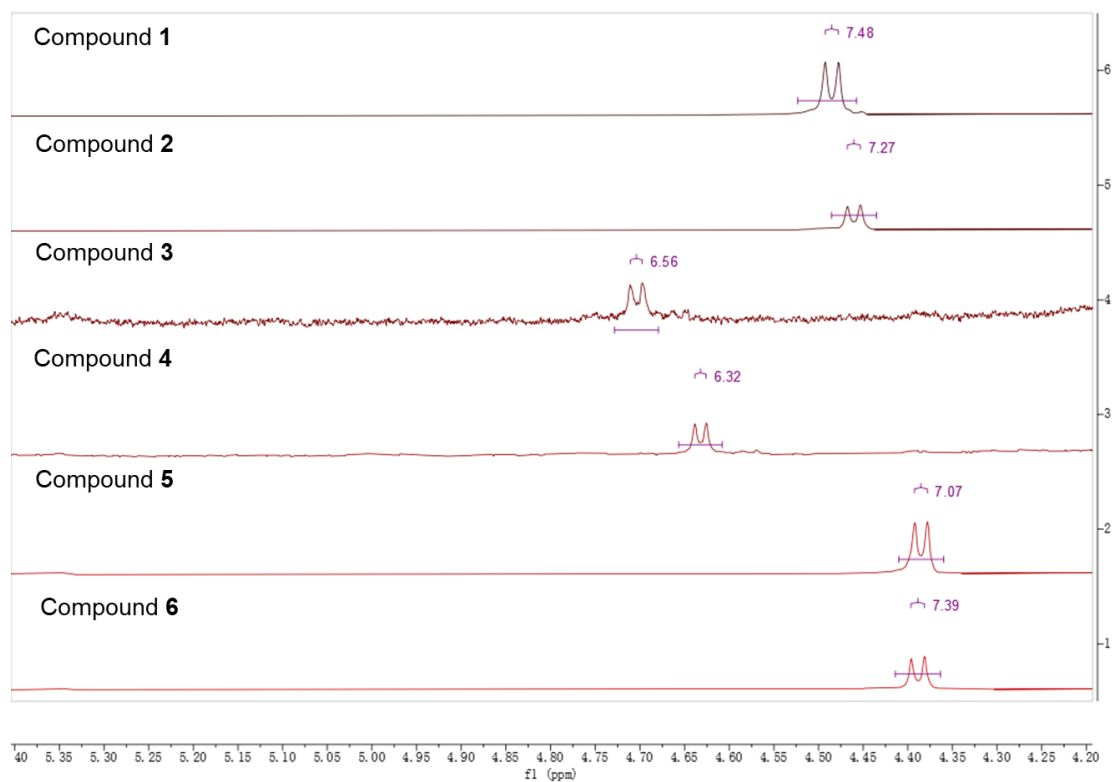

**Figure S28**  $^1\text{H-NMR}$  (500 MHz,  $\text{CDCl}_3$ ) spectrum of compound **1**

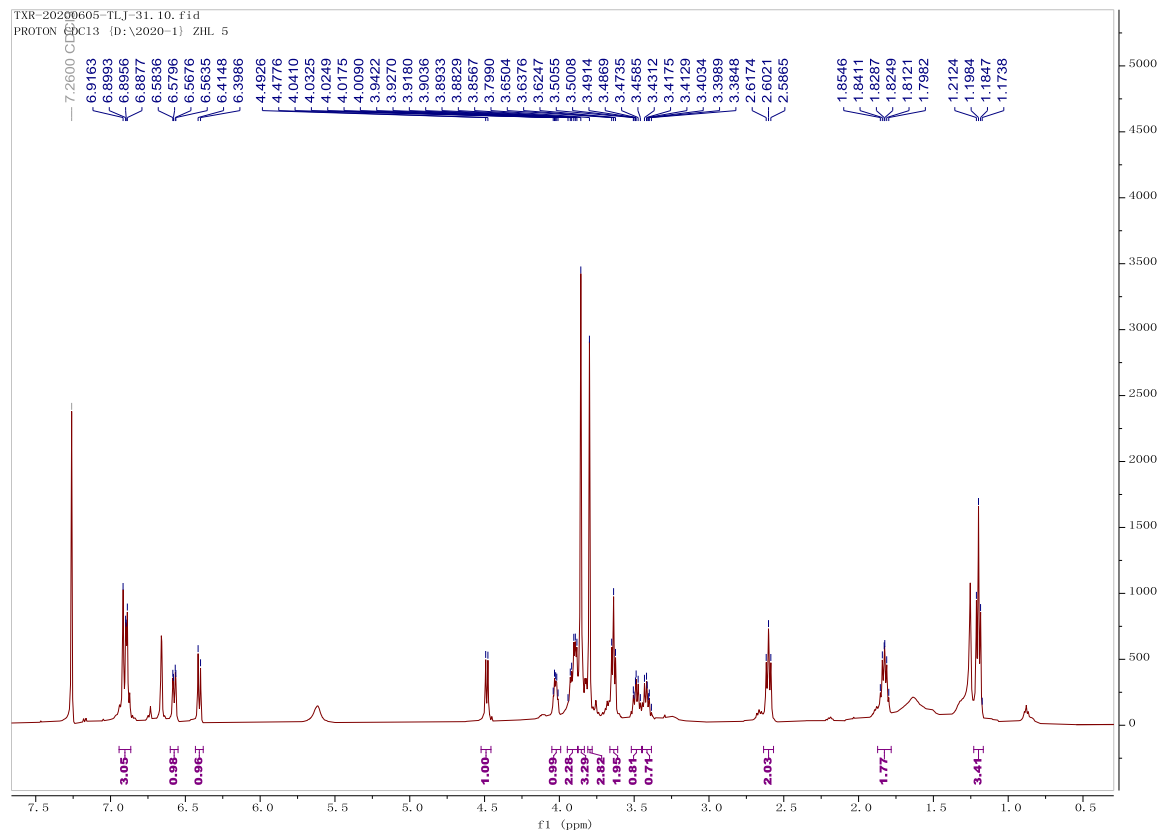

**Figure S29**  $^1\text{H-NMR}$  (500 MHz,  $\text{CDCl}_3$ ) spectrum of compound **2**

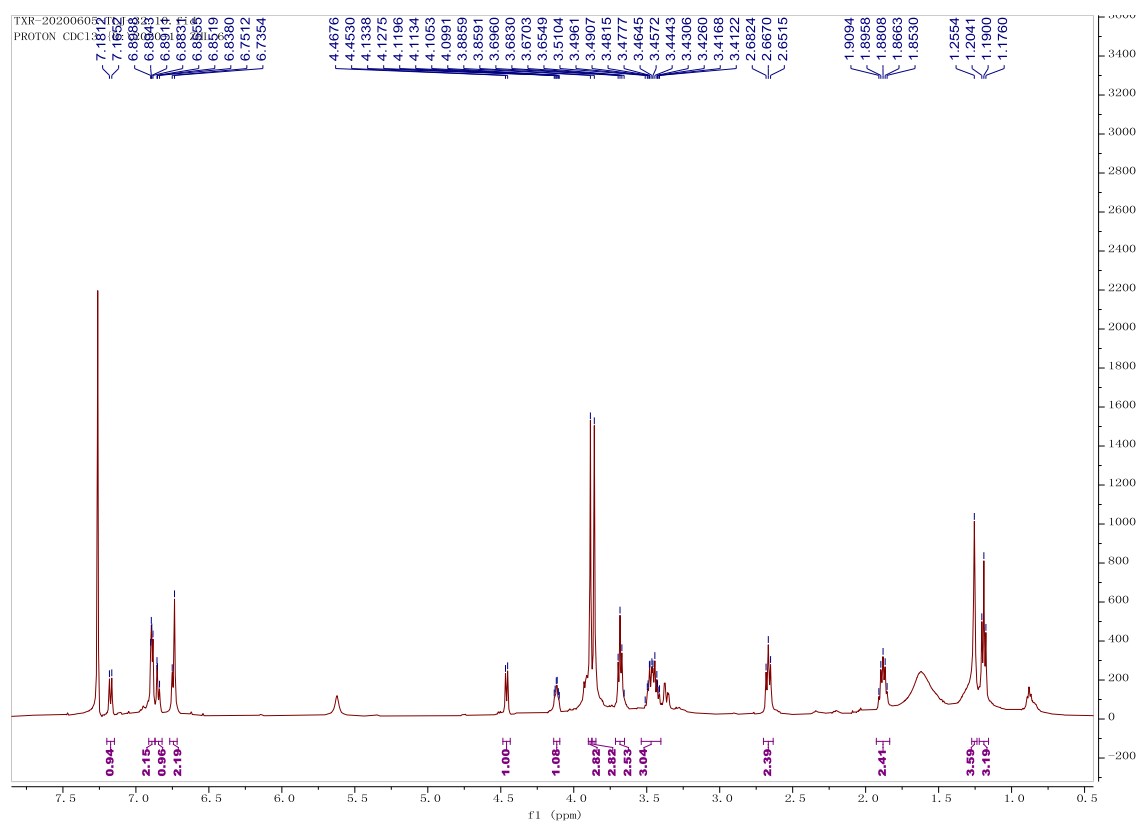

**Figure S30**  $^1\text{H-NMR}$  (500 MHz,  $\text{CDCl}_3$ ) spectrum of compound **3**

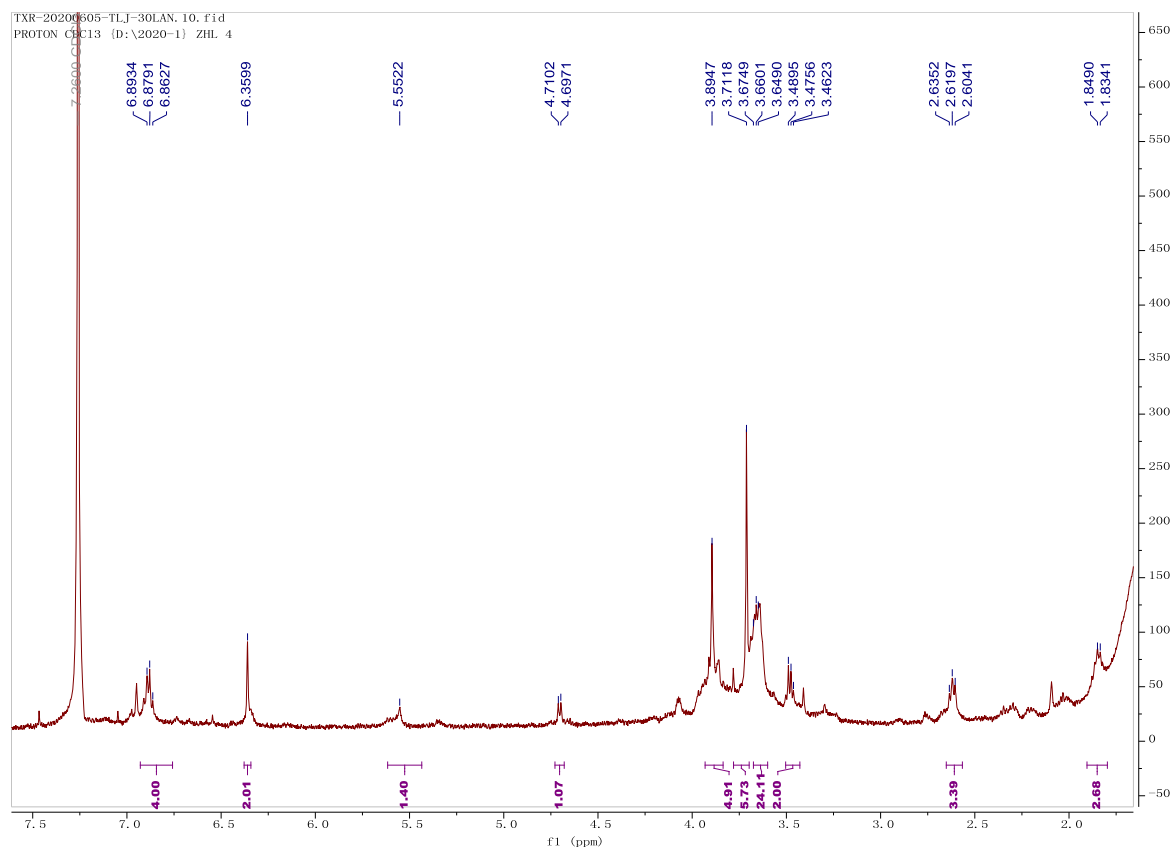

**Figure S31**  $^1\text{H-NMR}$  (500 MHz,  $\text{CDCl}_3$ ) spectrum of compound **4**

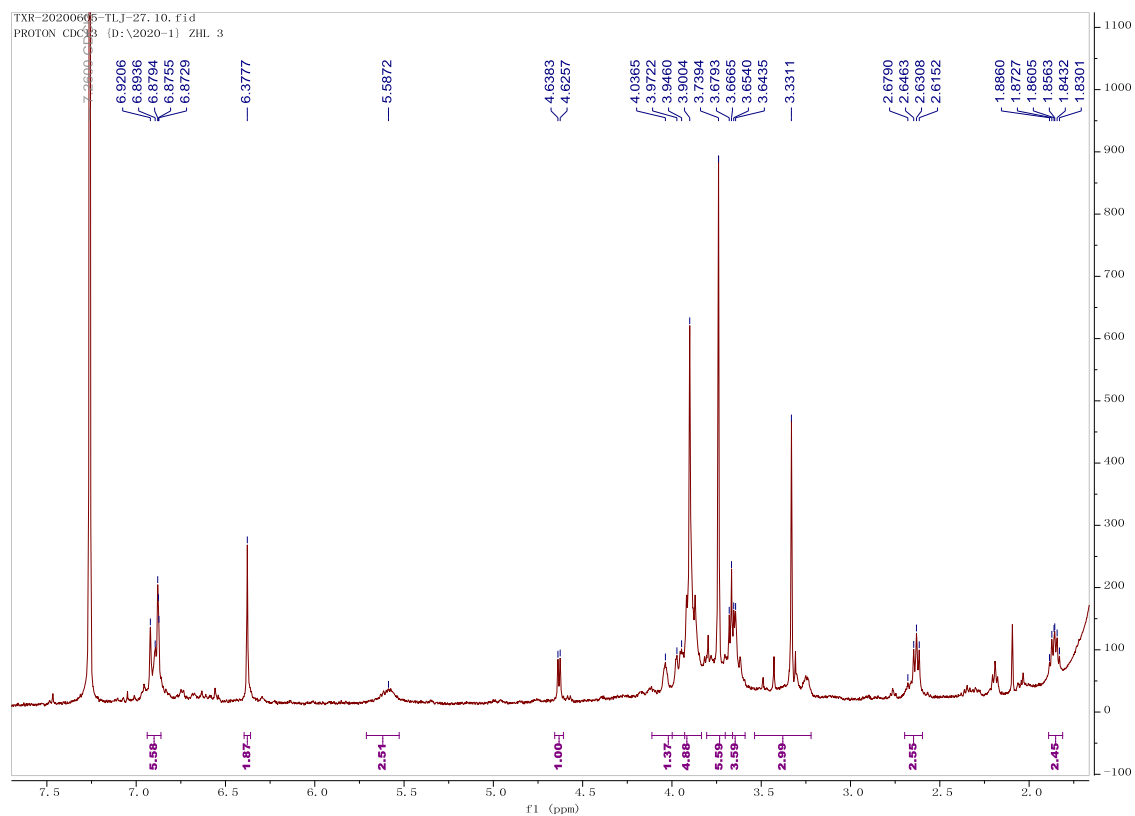

**Figure S32**  $^1\text{H-NMR}$  (500 MHz,  $\text{CDCl}_3$ ) spectrum of compound **5**

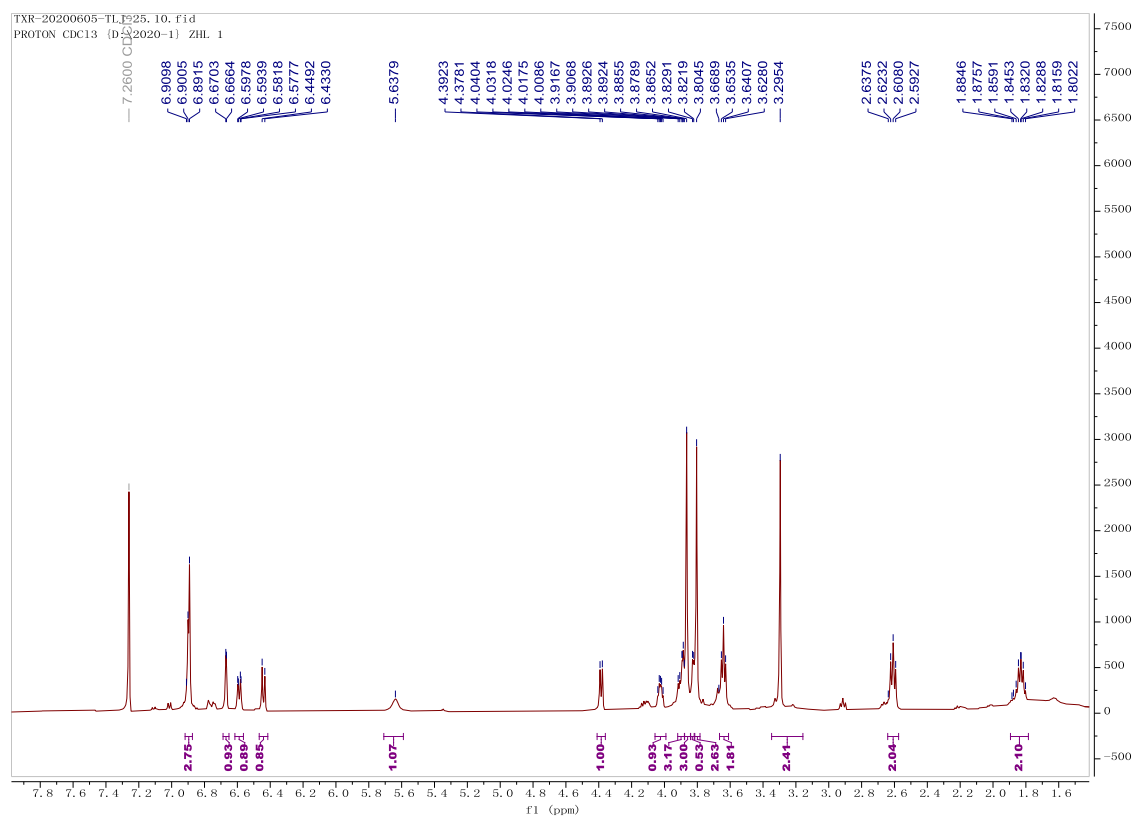

**Figure S33**  $^1\text{H-NMR}$  (500 MHz,  $\text{CDCl}_3$ ) spectrum of compound **6**

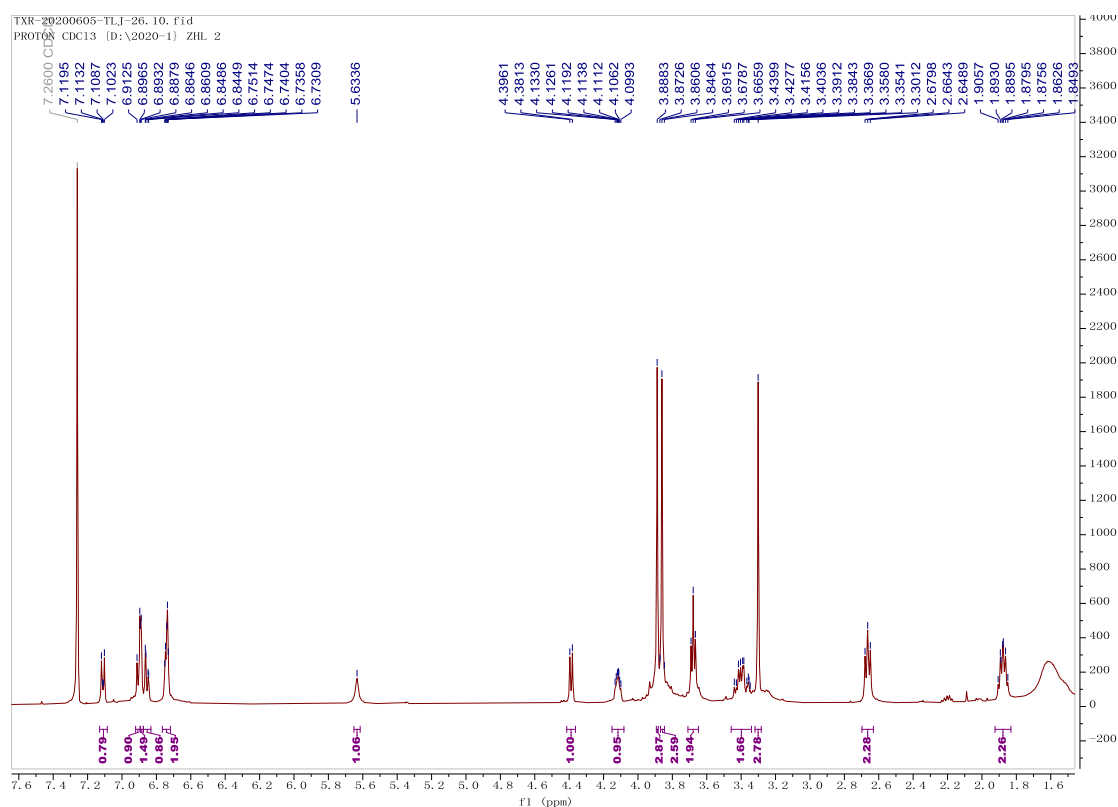

**Figure S34.** Experimental ECD spectra of compounds **1-6**

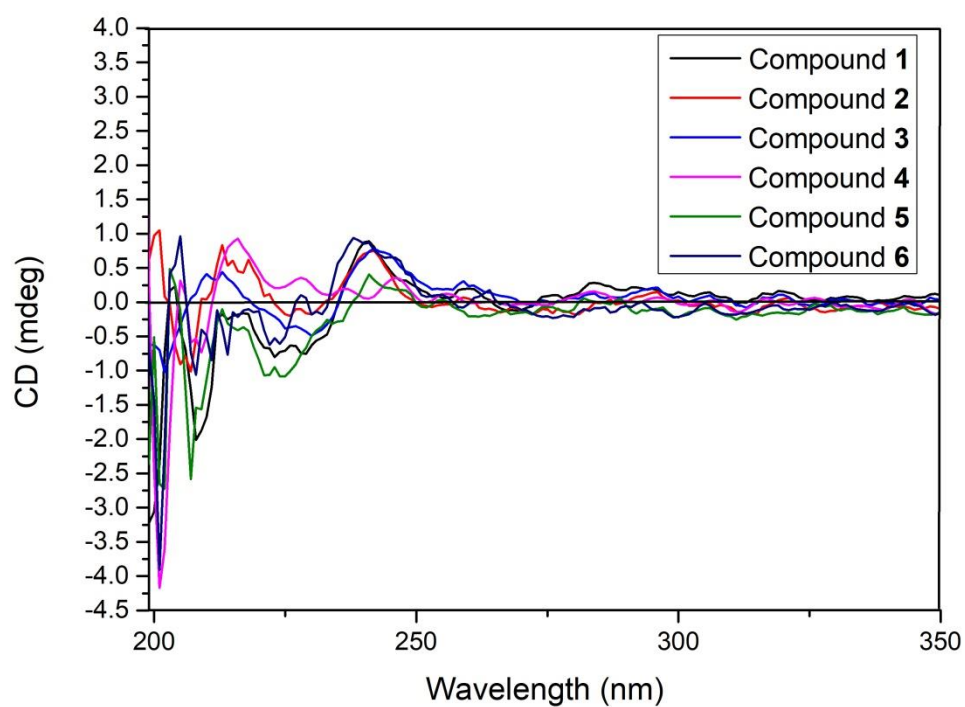

**Figure S35.** UV spectra of compounds **1-6**.

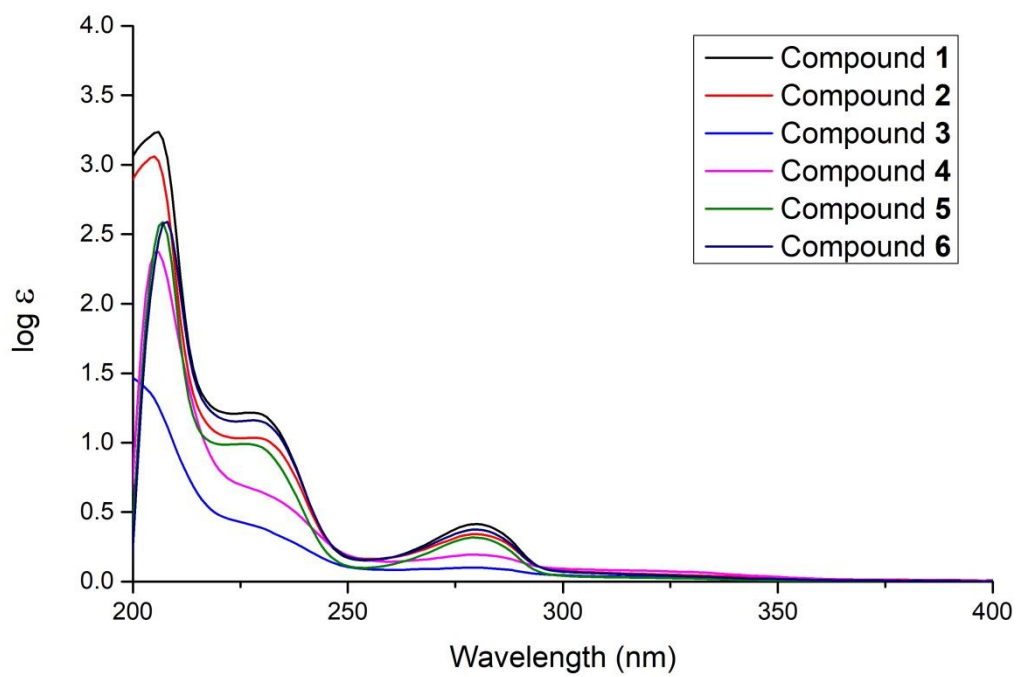

Supplement: ao0c02339_si_001.pdf [file ao0c02339_si_001.pdf]
